# Supplementary material for: Ancient diversity of Triticum aestivum subspecies as source of novel loci for bread wheat improvement
Source: Front Plant Sci. 2025 Apr 9;16:1536991. doi: 10.3389/fpls.2025.1536991 (PMC12014548; doi:10.3389/fpls.2025.1536991)
Supplement: Supplementary file 11 [file Table7.xlsx]

## Sheet: ST7A
Supplementary Table S7A: Physical locations on the Chinese Spring RefSeq v2.1
marker	chromosome	start (bp)	end (bp)	% identity*
tplb0028p02_562	1A	1206149	1206049	perfect match
AX-158544750	1A	1208427	1208329	98.99
GENE-0014_822	1A	1208845	1208947	97.087
GENE-0014_317	1A	1208901	1208801	perfect match
Excalibur_c94139_55	1A	1209534	1209634	perfect match
RAC875_c95364_259	1A	1232291	1232191	perfect match
RAC875_c42700_264	1A	1233647	1233747	98.02
Kukri_c36351_64	1A	1335511	1335411	98.02
BobWhite_c1361_1187	1A	1337563	1337663	perfect match
wsnp_Ra_c11211_18227610	1A	1341356	1341556	99.005
BS00026456_51	1A	4111372	4111272	perfect match
AX-109903200	1A	4372086	4372184	98.99
tplb0025b13_2687	1A	4379984	4379884	perfect match
tplb0025b13_2054	1A	4380983	4380883	perfect match
tplb0025b13_1721	1A	4381682	4381583	98.02
wsnp_Ku_c1818_3557408	1A	4383349	4383149	99.005
AX-89562713	1A	4383360	4383458	98.99
TG0003	1A	5187235	5187026	99.048
BS00023130_51	1A	6068668	6068768	perfect match
AX-111569969	1A	6072012	6071914	98.99
AX-158555547	1A	6073626	6073528	98.99
AX-158560734	1A	6073741	6073643	98.99
Kukri_c8390_1102	1A	7511303	7511403	98.02
wsnp_Ex_c2868_5293485	1A	8532547	8532747	perfect match
RAC875_c30657_82	1A	8533807	8533907	perfect match
AX-94692394	1A	8534037	8534107	perfect match
BS00056550_51	1A	8635647	8635747	98.02
BS00023201_51	1A	8982131	8982231	perfect match
BS00022355_51	1A	8997808	8997708	perfect match
AX-110068701	1A	9174725	9174627	98.99
Excalibur_c71158_54	1A	9635657	9635757	perfect match
wsnp_Ex_c57982_59470152	1A	9668048	9668248	perfect match
AX-158537511	1A	9967271	9967369	98.99
AX-110004070	1A	10424272	10424370	98.99
RAC875_rep_c72805_651	1A	10439826	10439726	perfect match
AX-95198429	1A	10914286	10914356	perfect match
RFL_Contig5637_1008	1A	10949889	10949789	perfect match
AX-95239997	1A	11012154	11012084	perfect match
GENE-4832_103	1A	11013366	11013462	97.938
BS00108351_51	1A	11350428	11350528	perfect match
tplb0053o08_2004	1A	11418279	11418379	perfect match
Excalibur_c114401_105	1A	11423945	11423845	perfect match
Excalibur_c9196_313	1A	11437002	11437102	perfect match
GENE-0172_551	1A	11437365	11437465	perfect match
Tdurum_contig14847_144	1A	11440030	11439930	perfect match
AX-94939233	1A	11454022	11454092	perfect match
AX-95200832	1A	11616724	11616794	perfect match
AX-158560668	1A	12185367	12185465	98.99
AX-158560691	1A	12951566	12951468	98.99
RAC875_c57939_78	1A	12956829	12956929	98.02
AX-95231896	1A	13103875	13103945	perfect match
AX-110952511	1A	13270464	13270562	98.99
AX-111527996	1A	13279415	13279513	98.99
RAC875_rep_c70613_78	1A	13310023	13310122	98.02
AX-158536828	1A	13314059	13314157	98.99
RAC875_c34888_65	1A	13535229	13535129	perfect match
AX-94604036	1A	13540711	13540611	perfect match
AX-110368802	1A	13547459	13547361	98.99
BS00022667_51	1A	13598678	13598578	perfect match
Ex_c4876_1221	1A	13745003	13744903	perfect match
AX-158537535	1A	13757883	13757981	98.99
BS00077350_51	1A	13803672	13803772	perfect match
AX-110003564	1A	13805976	13806074	98.99
tplb0061f07_961	1A	13808160	13808060	perfect match
wsnp_Ex_c7965_13520238	1A	13808659	13808859	99.005
TA012713-0667	1A	13809002	13808383	99.839
Ku_c4823_673	1A	13850423	13850323	98.02
AX-158569612	1A	13861034	13860936	98.99
AX-94982235	1A	13941930	13942000	perfect match
wsnp_Ex_c1137_2182795	1A	13942578	13942778	perfect match
Tdurum_contig42479_3110	1A	13943183	13943283	perfect match
Tdurum_contig42479_3800	1A	13943873	13943973	perfect match
Kukri_c41943_535	1A	14705622	14705522	perfect match
BS00081680_51	1A	15306326	15306426	perfect match
RAC875_c23587_271	1A	15306396	15306296	98.02
AX-94501544	1A	15584570	15584640	perfect match
Tdurum_contig83113_134	1A	15594447	15594347	perfect match
AX-94693693	1A	15669064	15668994	perfect match
Tdurum_contig52332_94	1A	15682014	15682114	perfect match
BS00022977_51	1A	15701284	15701384	perfect match
Tdurum_contig50845_82	1A	15701517	15701417	98.02
BS00026453_51	1A	15792543	15792443	perfect match
AX-94742021	1A	15899409	15899479	perfect match
AX-94815202	1A	16003963	16004033	perfect match
AX-95134745	1A	16041878	16041948	perfect match
RFL_Contig1118_1073	1A	16056136	16056236	perfect match
Tdurum_contig61492_458	1A	17324572	17324672	perfect match
RAC875_c54245_88	1A	17324672	17324572	perfect match
Tdurum_contig61492_684	1A	17324798	17324898	perfect match
AX-110956659	1A	17926143	17926241	98.99
AX-94952968	1A	18181633	18181703	perfect match
BS00064536_51	1A	18270330	18270230	perfect match
AX-94503555	1A	18270547	18270477	perfect match
BS00003761_51	1A	18271343	18271443	perfect match
AX-94923681	1A	18886213	18886283	perfect match
IAAV1469	1A	20347814	20348014	perfect match
BS00022738_51	1A	21988085	21988185	perfect match
BobWhite_c46501_92	1A	21988132	21988232	perfect match
Excalibur_c24303_1145	1A	21988272	21988372	98.02
Tdurum_contig11756_264	1A	21988528	21988428	98.02
AX-158560775	1A	22072582	22072680	98.99
AX-158606053	1A	22144279	22144377	98.99
AX-95657280	1A	22327325	22327255	perfect match
AX-94820348	1A	22425098	22425168	perfect match
AX-94581035	1A	22425198	22425268	perfect match
AX-158560731	1A	22702590	22702688	98.99
AX-158556703	1A	22704012	22704110	98.99
BS00039749_51	1A	22774132	22774032	perfect match
AX-158555549	1A	22806159	22806257	98.99
AX-158569592	1A	22851393	22851295	98.99
AX-94615199	1A	23559959	23560029	perfect match
AX-94599217	1A	23560020	23560090	perfect match
AX-94710260	1A	23983020	23983120	perfect match
Tdurum_contig34049_172	1A	25116506	25116406	perfect match
AX-158560674	1A	25960297	25960395	98.99
AX-158537518	1A	26029863	26029765	98.99
BS00078982_51	1A	26306528	26306628	perfect match
BS00105601_51	1A	26380270	26380170	perfect match
AX-89740804	1A	26380297	26380395	98.99
AX-158537529	1A	26387427	26387525	98.99
wsnp_Ex_c48087_53105842	1A	27000649	27000455	99.487
AX-95187202	1A	27001624	27001554	perfect match
AX-94917012	1A	27652372	27652442	perfect match
wsnp_Ex_c10783_17554146	1A	27653788	27653588	99.005
CAP7_c4833_141	1A	27655107	27655007	perfect match
CAP7_c4833_55	1A	27655193	27655093	perfect match
wsnp_Ku_c42878_50516167	1A	27853468	27853668	99.005
Kukri_c7436_2259	1A	29100824	29100724	perfect match
RAC875_c8245_272	1A	29103567	29103467	perfect match
AX-110911122	1A	29391111	29391209	98.99
RAC875_c16820_419	1A	29394844	29394944	perfect match
AX-89550716	1A	29894431	29894333	98.99
wsnp_BF484606A_Ta_2_3	1A	29896140	29896260	perfect match
AX-94507814	1A	30502597	30502527	perfect match
AX-89401734	1A	30751710	30751612	98.99
Kukri_c13136_1363	1A	30754680	30754780	perfect match
Excalibur_c7026_2635	1A	30760747	30760847	98.02
AX-94414472	1A	30900483	30900553	perfect match
Kukri_c22508_119	1A	30901294	30901194	perfect match
Kukri_c12534_559	1A	31333801	31333701	98.02
AX-158544725	1A	31383192	31383290	98.99
BS00064263_51	1A	31748565	31748465	perfect match
AX-158602205	1A	31748629	31748727	98.99
AX-94847170	1A	31749003	31749073	perfect match
Tdurum_contig8382_300	1A	31749340	31749240	perfect match
AX-94804842	1A	31937995	31938095	perfect match
AX-158560675	1A	32110928	32111026	98.99
AX-86169514	1A	32921641	32921543	98.99
AX-94682787	1A	33278937	33279007	perfect match
wsnp_BE586140A_Ta_2_1	1A	33904586	33904706	perfect match
BS00084022_51	1A	33905358	33905458	perfect match
GENE-0002_856	1A	34218337	34218433	97.938
AX-94858130	1A	34462716	34462786	perfect match
AX-94522489	1A	34484237	34484337	perfect match
AX-94443825	1A	34734929	34734829	perfect match
wsnp_Ex_c31983_40709607	1A	35074411	35074611	perfect match
wsnp_Ex_c31983_40709866	1A	35074670	35074870	perfect match
Kukri_c46010_146	1A	35075036	35075136	perfect match
AX-94803018	1A	35408482	35408552	perfect match
Tdurum_contig13946_241	1A	35553949	35554049	perfect match
Tdurum_contig13946_329	1A	35554037	35554137	98.02
Tdurum_contig29280_216	1A	35557083	35557183	perfect match
Kukri_c82555_88	1A	35557219	35557319	98.02
AX-158560632	1A	36568241	36568339	98.99
AX-158539970	1A	37821916	37822014	98.99
AX-94415898	1A	39778012	39778082	perfect match
AX-158537531	1A	39784912	39784814	98.99
AX-109897617	1A	39785238	39785140	98.99
wsnp_BE490041A_Ta_2_1	1A	40999922	41000043	97.541
RAC875_c826_2186	1A	41664235	41664335	perfect match
AX-158556673	1A	43626454	43626552	98.99
IAAV5652	1A	43976524	43976708	perfect match
IAAV614	1A	43976961	43977161	perfect match
AX-94488826	1A	44096342	44096412	perfect match
AX-158536830	1A	44376940	44377038	98.99
Tdurum_contig47183_205	1A	44520633	44520533	perfect match
AX-89777926	1A	44767073	44767171	98.99
AX-94526630	1A	44811452	44811522	perfect match
AX-94567354	1A	46622111	46622041	perfect match
Tdurum_contig9199_714	1A	48358779	48358679	perfect match
RFL_Contig3232_1224	1A	48358866	48358966	perfect match
BS00067339_51	1A	48795578	48795478	perfect match
Ra_c27593_460	1A	48798007	48798107	perfect match
Excalibur_c12215_352	1A	48799040	48798940	perfect match
Tdurum_contig5008_635	1A	50345350	50345250	perfect match
Tdurum_contig5008_556	1A	50345429	50345329	perfect match
Tdurum_contig69753_513	1A	50377153	50377253	perfect match
AX-95079481	1A	51324618	51324688	perfect match
AX-158569384	1A	51382382	51382480	98.99
Kukri_c23985_229	1A	51529477	51529577	perfect match
AX-95087496	1A	51649455	51649385	perfect match
BobWhite_c4646_119	1A	51703047	51703147	98.02
IACX5982	1A	51703116	51702997	perfect match
RAC875_c5544_4156	1A	51838083	51838183	perfect match
AX-94916468	1A	53461601	53461671	perfect match
IAAV5931	1A	56529147	56528947	perfect match
RAC875_c46269_387	1A	60259911	60260011	perfect match
RAC875_c11899_366	1A	61189576	61189676	perfect match
Kukri_c25500_879	1A	61324114	61324014	98.02
AX-94678574	1A	63843911	63843841	perfect match
wsnp_Ex_c3253_5994376	1A	65068554	65068354	perfect match
wsnp_Ex_c2181_4089788	1A	67026078	67026278	perfect match
IAAV4349	1A	67141543	67141343	perfect match
AX-109369758	1A	70771076	70770978	98.99
AX-94621346	1A	76797789	76797859	perfect match
AX-95186684	1A	80142127	80142057	perfect match
AX-109918551	1A	88847772	88847674	98.99
AX-95229220	1A	91713517	91713587	perfect match
IACX6344	1A	94822123	94822229	perfect match
AX-109853902	1A	94822334	94822432	98.99
BS00066852_51	1A	96364101	96364001	perfect match
BS00065001_51	1A	98666316	98666416	98.02
wsnp_BF478737A_Ta_2_1	1A	101239939	101239853	97.701
IAAV7414	1A	102144107	102143907	perfect match
wsnp_Ex_c14733_22819625	1A	102144182	102144382	perfect match
AX-94673150	1A	103222884	103222954	perfect match
BS00076668_51	1A	103512911	103513011	perfect match
RAC875_rep_c76047_63	1A	103605081	103605180	98.02
CAP11_c2984_419	1A	104209414	104209314	perfect match
wsnp_Ex_c48375_53299028	1A	104211152	104210952	perfect match
wsnp_Ex_c18662_27538313	1A	106770959	106770759	perfect match
wsnp_Ex_c44498_50537128	1A	107735890	107735690	99.005
BS00064029_51	1A	109601279	109601379	perfect match
Ku_c2449_578	1A	109899655	109899577	97.5
RAC875_c2202_1097	1A	109901026	109900926	perfect match
Kukri_c12000_1447	1A	110964691	110964791	98.02
wsnp_Ku_rep_c68419_67400635	1A	114224483	114224313	perfect match
Ex_c801_820	1A	115016336	115016236	perfect match
Ex_c801_555	1A	115016601	115016501	perfect match
BS00087437_51	1A	116044467	116044367	perfect match
IAAV2342	1A	117543842	117544042	perfect match
BS00028874_51	1A	119974852	119974952	perfect match
BS00048117_51	1A	120455964	120456064	perfect match
AX-94782852	1A	121822530	121822600	perfect match
BS00010004_51	1A	122167192	122167292	perfect match
BS00010287_51	1A	122167489	122167589	perfect match
AX-95074028	1A	128670435	128670505	perfect match
wsnp_Ex_c28165_37310070	1A	134070869	134070669	perfect match
wsnp_Ex_c11374_18361760	1A	134584578	134584778	perfect match
wsnp_Ku_c3468_6420199	1A	134588549	134588349	99.005
Ex_c23451_720	1A	137046533	137046462	perfect match
wsnp_Ra_c7847_13421750	1A	137609227	137609427	perfect match
wsnp_Ex_rep_c66318_64485410	1A	138059235	138059035	perfect match
wsnp_Ex_rep_c105244_89727666	1A	139045911	139046111	perfect match
BS00030644_51	1A	140310882	140310782	perfect match
Excalibur_c64855_328	1A	145375192	145375292	perfect match
BS00003813_51	1A	152953164	152953264	perfect match
RAC875_c21367_209	1A	156620095	156620195	perfect match
AX-158555559	1A	161192060	161191962	98.99
Kukri_c23382_1431	1A	178405279	178405179	perfect match
Ku_c2898_1247	1A	184191998	184191898	98.02
wsnp_Ex_c13724_21535046	1A	187235028	187234828	perfect match
wsnp_Ex_c17684_26426672	1A	203881325	203881525	perfect match
wsnp_Ex_c591_1177097	1A	205448838	205448638	perfect match
wsnp_Ex_c13783_21613564	1A	211007038	211007236	99.497
RAC875_c19509_174	1A	214020672	214020572	perfect match
wsnp_Ex_c3747_6824863	1A	219582666	219582466	99.005
BS00065700_51	1A	221318807	221318707	perfect match
IAAV9022	1A	224859917	224860117	perfect match
wsnp_Ex_c3567_6526582	1A	224860965	224861165	perfect match
wsnp_Ra_rep_c105422_89367749	1A	225874382	225874182	perfect match
wsnp_Ex_c6934_11953178	1A	230434937	230435137	perfect match
wsnp_Ex_c19730_28728245	1A	233967963	233968161	98.507
BS00067330_51	1A	235801643	235801543	perfect match
wsnp_Ex_c8374_14111734	1A	237547179	237547379	perfect match
wsnp_Ex_c11697_18821490	1A	238581483	238581683	perfect match
wsnp_Ex_c6826_11774795	1A	240525675	240525875	perfect match
BS00063063_51	1A	242155421	242155321	perfect match
wsnp_Ex_c6278_10941843	1A	243842539	243842739	perfect match
wsnp_Ra_c6474_11298858	1A	253484313	253484513	99.005
Ra_c11042_1500	1A	253486439	253486339	perfect match
AX-158536817	1A	256272069	256272167	98.99
wsnp_BE518393A_Td_2_3	1A	257776950	257776830	98.347
AX-94480929	1A	262714977	262715047	perfect match
AX-111589160	1A	269653479	269653381	98.99
BS00021730_51	1A	274126129	274126229	perfect match
BS00048887_51	1A	276589988	276590088	perfect match
RAC875_c18282_1390	1A	281624161	281624261	98.02
Tdurum_contig19102_84	1A	281624705	281624805	perfect match
BS00086680_51	1A	283434553	283434453	perfect match
AX-94581964	1A	289481748	289481818	perfect match
BS00065930_51	1A	291121296	291121196	perfect match
CAP8_c806_297	1A	299130468	299130368	perfect match
GENE-0227_217	1A	299446340	299446240	perfect match
Excalibur_c20133_87	1A	299785481	299785381	perfect match
BS00022201_51	1A	299863172	299863272	perfect match
BS00102492_51	1A	299863201	299863301	perfect match
BS00063885_51	1A	300303900	300303800	perfect match
TA001042-0912	1A	302923426	302923478	perfect match
Tdurum_contig43360_1381	1A	302923740	302923640	98.02
AX-94648330	1A	303498953	303498883	perfect match
IAAV4916	1A	303499082	303498881	99.01
BS00031200_51	1A	303504749	303504849	perfect match
Ra_c2322_174	1A	303579716	303579816	perfect match
Ra_c2322_1067	1A	303586281	303586381	perfect match
IACX7695	1A	303619944	303619768	perfect match
AX-94895904	1A	305566968	305566898	perfect match
wsnp_Ku_c30921_40705731	1A	305567114	305566914	perfect match
AX-110545841	1A	305572406	305572504	98.99
AX-110417344	1A	305747909	305748007	98.99
IAAV3552	1A	305750051	305749851	perfect match
CAP7_c3885_73	1A	307042502	307042602	perfect match
Excalibur_c37474_179	1A	308688542	308688442	98.02
BS00064548_51	1A	309181796	309181896	98.02
wsnp_Ku_rep_c71909_71634013	1A	310508211	310508011	perfect match
AX-110029490	1A	310636364	310636266	98.99
BS00064679_51	1A	313480423	313480523	perfect match
AX-110368348	1A	313520712	313520614	98.99
AX-94663988	1A	313525305	313525235	perfect match
BS00072686_51	1A	314831649	314831749	perfect match
GENE-0572_334	1A	315406448	315406348	perfect match
AX-158537370	1A	316287128	316287030	98.99
wsnp_BE585780A_Ta_2_1	1A	320720684	320720804	perfect match
wsnp_Ex_c5634_9907829	1A	321854581	321854381	perfect match
BS00090634_51	1A	321854600	321854500	perfect match
wsnp_Ex_c5634_9906981	1A	321855429	321855229	perfect match
AX-94907052	1A	321855682	321855612	perfect match
AX-94397743	1A	321967609	321967539	perfect match
IAAV6919	1A	326097470	326097270	99.005
wsnp_Ex_c1427_2736441	1A	338553327	338553127	perfect match
wsnp_Ku_c17726_26872129	1A	339199853	339200053	perfect match
wsnp_Ex_c44049_50205457	1A	339220889	339221089	perfect match
wsnp_Ex_c8364_14095508	1A	340383364	340383164	perfect match
AX-158560317	1A	343153341	343153439	98.99
wsnp_Ex_c14866_22995097	1A	344966281	344966481	perfect match
BS00090408_51	1A	345235834	345235734	perfect match
AX-158560544	1A	345671459	345671361	98.99
RAC875_c18539_1159	1A	345846289	345846389	perfect match
IAAV5730	1A	346031928	346032128	perfect match
Ex_c5759_663	1A	346656516	346656424	97.849
wsnp_Ex_c33831_42253707	1A	346856294	346856094	perfect match
Ku_c6979_182	1A	347996880	347996780	perfect match
AX-158539908	1A	349185196	349185294	98.99
wsnp_Ex_c9979_16421462	1A	349185405	349185205	perfect match
Tdurum_contig41931_480	1A	353412258	353412158	perfect match
Ex_c12763_662	1A	353542304	353542203	98.039
wsnp_Ex_c1374_2630879	1A	353665771	353665571	99.005
wsnp_Ex_c8885_14842394	1A	353701288	353701088	perfect match
wsnp_Ex_c21592_30743513	1A	354778459	354778259	perfect match
BS00009731_51	1A	355147978	355147878	perfect match
RFL_Contig5001_1099	1A	355437401	355437501	perfect match
RAC875_c33300_141	1A	355822854	355822953	99
CAP12_c6266_339	1A	356340364	356340264	98.02
CAP12_c6266_298	1A	356340405	356340305	perfect match
AX-89648769	1A	356454297	356454395	98.99
BobWhite_c46349_402	1A	356454919	356455015	perfect match
Excalibur_rep_c86757_244	1A	356466202	356466102	98.02
Excalibur_c17872_137	1A	356850197	356850297	perfect match
AX-108791745	1A	357229908	357230006	98.99
Kukri_rep_c103147_745	1A	357984673	357984573	98.02
RAC875_c38417_246	1A	360259486	360259386	perfect match
RAC875_c8515_653	1A	364092097	364092197	perfect match
Ra_c11023_679	1A	364322823	364322723	perfect match
AX-110040012	1A	368814794	368814696	98.99
AX-108760176	1A	368865119	368865217	98.99
wsnp_Ex_c3906_7086162	1A	370238443	370238644	99.01
wsnp_Ex_c3906_7086294	1A	370238576	370238776	perfect match
IAAV749	1A	370510721	370510521	perfect match
Tdurum_contig48416_335	1A	370921858	370921758	perfect match
wsnp_Ex_rep_c103087_88124573	1A	371115286	371115486	perfect match
AX-158539847	1A	371410116	371410018	98.99
AX-109963861	1A	371411795	371411697	98.99
GENE-0053_224	1A	371506865	371506966	98.039
wsnp_Ex_c4605_8241260	1A	371519174	371518974	perfect match
TA001772-0625	1A	375609095	375609042	perfect match
BS00094681_51	1A	376079886	376079786	perfect match
AX-110063653	1A	376852729	376852631	98.99
wsnp_BE403956A_Ta_2_3	1A	376854778	376854658	perfect match
IACX293	1A	376855136	376855016	98.347
BS00077199_51	1A	376861244	376861144	perfect match
BS00011712_51	1A	378054908	378054808	perfect match
AX-110368979	1A	378722339	378722437	98.99
wsnp_Ku_c4413_8008008	1A	378921759	378921959	perfect match
RAC875_c25799_457	1A	382811717	382811617	perfect match
GENE-0235_131	1A	382813660	382813560	perfect match
BS00041358_51	1A	383314631	383314731	perfect match
RAC875_c12808_182	1A	383723942	383724042	perfect match
wsnp_Ku_c37925_46679146	1A	383724614	383724814	99.005
BS00065146_51	1A	384226544	384226644	perfect match
wsnp_Ex_c3986_7217641	1A	386978895	386978695	perfect match
AX-110500656	1A	389131688	389131590	98.99
Excalibur_rep_c84731_611	1A	394218780	394218680	perfect match
AX-110387060	1A	404591944	404591846	98.99
AX-94558187	1A	405306178	405306108	perfect match
RFL_Contig530_2305	1A	426654980	426655080	perfect match
Ex_c25689_1606	1A	434839360	434839260	perfect match
AX-95083332	1A	434847419	434847349	perfect match
RAC875_rep_c104557_1245	1A	436286822	436286922	perfect match
wsnp_Ex_c10257_16825240	1A	438273857	438273657	perfect match
GENE-0505_443	1A	443596587	443596687	perfect match
AX-109387872	1A	458031870	458031968	98.99
AX-158537396	1A	462061399	462061301	98.99
AX-94550611	1A	462712498	462712568	perfect match
Kukri_c22434_513	1A	464140762	464140861	99
wsnp_Ku_c4018_7333828	1A	464141188	464140988	perfect match
wsnp_Ex_c572_1138770	1A	464141354	464141154	perfect match
IAAV7203	1A	464141585	464141785	98.515
wsnp_Ex_c572_1138503	1A	464141621	464141421	perfect match
wsnp_Ex_c572_1138339	1A	464141785	464141585	perfect match
Ra_c2895_591	1A	464142140	464142040	perfect match
AX-94702400	1A	464503308	464503378	perfect match
AX-158556652	1A	464744151	464744053	98.99
AX-94542559	1A	464744487	464744417	perfect match
Excalibur_c59894_97	1A	465512855	465512955	perfect match
AX-110554067	1A	465526823	465526725	98.99
AX-94478919	1A	465659654	465659584	perfect match
AX-94550326	1A	465811519	465811589	perfect match
AX-86173157	1A	465944268	465944366	98.99
AX-94600055	1A	466486413	466486483	perfect match
RAC875_c86680_391	1A	466503206	466503106	98.02
Kukri_c88698_296	1A	466529911	466530011	perfect match
BS00021719_51	1A	466821977	466821877	perfect match
AX-158560449	1A	466924659	466924757	98.99
BobWhite_c38865_319	1A	466970319	466970219	98.02
AX-158569255	1A	473105971	473106069	98.99
IACX3496	1A	473132257	473132138	perfect match
AX-158544639	1A	473343459	473343557	98.99
AX-158544635	1A	473805300	473805398	98.99
wsnp_Ex_c25734_34995416	1A	473808012	473808212	perfect match
AX-158539806	1A	475823081	475823179	98.99
AX-89417659	1A	475823168	475823266	98.99
AX-95110122	1A	475830726	475830658	perfect match
AX-94731227	1A	475832266	475832196	perfect match
Kukri_c3582_87	1A	476273863	476273763	perfect match
AX-158556546	1A	477342324	477342226	98.99
AX-111503623	1A	478529288	478529190	98.99
wsnp_Ku_c2815_5317230	1A	478638205	478638405	perfect match
wsnp_Ex_c16592_25117132	1A	478667494	478667694	perfect match
AX-158605696	1A	479036432	479036334	98.99
Kukri_c10239_2186	1A	479272264	479272164	perfect match
wsnp_Ra_c7818_13376644	1A	479272501	479272301	perfect match
AX-94554383	1A	479318626	479318556	perfect match
AX-158544398	1A	479965150	479965052	98.99
AX-158569064	1A	480612452	480612550	98.99
AX-158556474	1A	481280363	481280265	98.99
Kukri_c27785_400	1A	481434285	481434185	perfect match
BS00023126_51	1A	482207960	482207860	perfect match
AX-158537448	1A	482351824	482351726	98.99
BS00040968_51	1A	482357895	482357795	perfect match
BS00067420_51	1A	482358243	482358143	perfect match
BS00067421_51	1A	482358262	482358163	98.02
AX-158539812	1A	482431044	482430946	98.99
AX-108782275	1A	482843445	482843347	98.99
AX-111509952	1A	483118868	483118966	98.99
wsnp_BE495786A_Ta_2_1	1A	483251430	483251310	perfect match
BS00087600_51	1A	483254522	483254622	perfect match
BS00087601_51	1A	483254690	483254790	perfect match
Ku_c1571_1457	1A	483291418	483291318	perfect match
BS00022698_51	1A	483919441	483919541	perfect match
BS00002216_51	1A	483925774	483925674	perfect match
IACX4378	1A	483925794	483925675	98.333
AX-158539802	1A	483927991	483927893	98.99
RAC875_c94534_75	1A	484358666	484358766	perfect match
AX-110951565	1A	484550767	484550865	98.99
BS00094925_51	1A	484551060	484550960	perfect match
RFL_Contig3203_1971	1A	484551146	484551046	perfect match
IACX742	1A	484617694	484617575	98.347
AX-94513107	1A	484618183	484618253	perfect match
AX-109890741	1A	485509053	485508955	98.99
AX-110399569	1A	485910699	485910601	98.99
AX-89431767	1A	485910778	485910680	98.99
RAC875_c31276_1128	1A	485917441	485917541	perfect match
wsnp_Ra_c12148_19539667	1A	485918027	485918227	perfect match
wsnp_Ex_c5192_9203682	1A	486584327	486584127	99.005
AX-108962998	1A	486589254	486589156	98.99
Excalibur_c32167_59	1A	486922882	486922782	98.02
wsnp_Ra_c37745_45806931	1A	486923508	486923708	99.005
wsnp_Ex_c34344_42677360	1A	486936636	486936836	perfect match
wsnp_Ex_rep_c66628_64934660	1A	486937620	486937820	perfect match
AX-109396777	1A	487916974	487917072	98.99
AX-158537452	1A	488239279	488239377	98.99
Excalibur_c49421_443	1A	488586748	488586648	98.02
wsnp_Ex_c53976_57027635	1A	488589852	488590051	99.005
IAAV5406	1A	488884626	488884826	perfect match
wsnp_Ra_c16080_24638622	1A	489304404	489304604	perfect match
AX-158544600	1A	489304836	489304934	98.99
AX-110509256	1A	489639026	489638928	98.99
AX-109288465	1A	489639540	489639442	98.99
RFL_Contig4231_575	1A	489640056	489640156	perfect match
AX-158560583	1A	490799750	490799848	98.99
BS00021714_51	1A	491642328	491642228	perfect match
AX-158605815	1A	491693855	491693953	98.99
AX-94583334	1A	491967739	491967669	perfect match
AX-158560555	1A	492335660	492335758	98.99
RAC875_c23081_141	1A	492678194	492678094	perfect match
AX-94796020	1A	492683071	492683001	perfect match
wsnp_Ex_c21193_30320134	1A	492696333	492696533	perfect match
AX-108897448	1A	493196235	493196333	98.99
AX-94638030	1A	493531241	493531171	perfect match
wsnp_Ex_c21336_30465618	1A	493668485	493668285	perfect match
BS00065889_51	1A	493737746	493737846	perfect match
AX-109920916	1A	494164255	494164157	98.99
AX-158544605	1A	494737712	494737614	98.99
AX-158544603	1A	494754188	494754090	98.99
AX-158544469	1A	494801371	494801469	98.99
AX-108753174	1A	495347442	495347540	98.99
AX-109834411	1A	495350513	495350611	98.99
AX-158605760	1A	495700432	495700530	98.99
IAAV5535	1A	497828854	497829054	perfect match
IACX3047	1A	497993873	497993992	perfect match
AX-158537471	1A	497994547	497994449	98.99
AX-109401732	1A	498340944	498341042	98.99
AX-111709931	1A	498596606	498596704	98.99
AX-111506455	1A	499012037	499012135	98.99
AX-109405334	1A	499016319	499016417	98.99
BS00089894_51	1A	499031335	499031235	perfect match
AX-111499659	1A	499031395	499031297	98.99
AX-158556605	1A	499129778	499129680	98.99
AX-94462123	1A	499267483	499267553	perfect match
AX-108754470	1A	499462111	499462013	98.99
AX-158569077	1A	499474027	499473929	98.99
wsnp_Ex_rep_c109742_92411838	1A	499554210	499554010	perfect match
AX-158536689	1A	499643752	499643654	98.99
wsnp_Ku_c21316_31053745	1A	499646938	499647138	99.005
AX-86174938	1A	499647119	499647021	98.99
AX-108851331	1A	499904938	499904840	98.99
Kukri_c30322_414	1A	500039459	500039559	perfect match
TGWA25K-TG0182	1A	500309086	500308988	98.99
RAC875_rep_c112044_340	1A	500312799	500312899	98.02
AX-110003783	1A	500936453	500936551	98.99
AX-158536815	1A	500939986	500940084	98.99
AX-95235178	1A	501301544	501301474	perfect match
AX-108883214	1A	501833929	501833831	98.99
AX-89453705	1A	502058684	502058782	98.99
AX-158544537	1A	502308878	502308976	98.99
AX-158537475	1A	502308908	502309006	98.99
AX-111135532	1A	502327481	502327579	98.99
AX-158537445	1A	502444774	502444872	98.99
wsnp_Ra_c3270_6136601	1A	502464504	502464703	99
Kukri_rep_c117029_125	1A	502472071	502472171	perfect match
wsnp_BE445113A_Ta_2_1	1A	502514368	502514488	perfect match
wsnp_BE445113A_Ta_2_2	1A	502514441	502514561	perfect match
AX-110924523	1A	502522285	502522187	98.99
AX-95188181	1A	504280488	504280418	perfect match
AX-158537446	1A	504791196	504791098	98.99
wsnp_Ku_c15214_23756800	1A	504792968	504793168	perfect match
wsnp_BG314157A_Ta_2_1	1A	504849737	504849617	perfect match
AX-94631158	1A	505759432	505759362	perfect match
RAC875_c29540_1109	1A	505761860	505761760	perfect match
RAC875_c29540_413	1A	505762551	505762451	98.02
wsnp_Ra_c33025_41968284	1A	505763737	505763537	perfect match
wsnp_Ex_rep_c108951_91954190	1A	505764179	505764379	perfect match
AX-94644377	1A	505765739	505765809	perfect match
AX-158560436	1A	505766150	505766052	98.99
BS00021728_51	1A	505766503	505766603	perfect match
AX-95088854	1A	505916582	505916652	perfect match
Kukri_c58155_786	1A	505917977	505917877	perfect match
AX-109420401	1A	506498078	506498176	98.99
BS00096721_51	1A	506786870	506786970	perfect match
RAC875_c37545_289	1A	506799493	506799393	perfect match
AX-89341466	1A	506985462	506985364	98.99
BS00064638_51	1A	507040214	507040314	98.02
Kukri_c29039_315	1A	507186605	507186705	perfect match
AX-111026726	1A	508100231	508100133	98.99
wsnp_Ku_c10292_17066821	1A	508358664	508358464	perfect match
AX-158569338	1A	508495118	508495020	98.99
AX-108882911	1A	508504403	508504501	98.99
AX-158569260	1A	508578595	508578693	98.99
wsnp_Ku_c1642_3232242	1A	508582199	508581999	perfect match
AX-109358058	1A	508583252	508583350	98.99
AX-89618429	1A	509373575	509373673	98.99
AX-158537444	1A	510023845	510023943	98.99
RAC875_c16391_426	1A	510051862	510051962	perfect match
AX-108829158	1A	510137318	510137416	98.99
AX-109320272	1A	510217433	510217335	98.99
AX-94519549	1A	510219331	510219261	perfect match
AX-109891947	1A	510528764	510528666	98.99
AX-111499300	1A	511761016	511761114	98.99
AX-110364500	1A	512479000	512479098	98.99
AX-110375940	1A	512483822	512483920	98.99
AX-94618537	1A	512573090	512573020	perfect match
AX-109279209	1A	512952912	512952814	98.99
AX-108902594	1A	514333213	514333311	98.99
AX-158555342	1A	514357510	514357608	98.99
AX-108748722	1A	514952826	514952924	98.99
Kukri_c54678_88	1A	515082075	515082175	perfect match
AX-158536690	1A	515082332	515082234	98.99
Kukri_c1313_1158	1A	515166987	515167087	perfect match
Ku_c1313_1673	1A	515167502	515167602	perfect match
AX-89413000	1A	515240272	515240174	98.99
AX-109309948	1A	515336995	515337093	98.99
Ku_c10813_1122	1A	515393842	515393942	perfect match
Ra_c64515_242	1A	515396136	515396236	perfect match
wsnp_Ex_c1997_3755945	1A	515637949	515637749	99.005
wsnp_JD_c6544_7697578	1A	515638289	515638089	99.005
Jagger_c5280_407	1A	515638305	515638405	perfect match
AX-158539839	1A	517205868	517205966	98.99
RAC875_c80876_67	1A	517211373	517211473	98.02
AX-158560524	1A	517696110	517696012	98.99
AX-110480323	1A	517697263	517697165	98.99
wsnp_Ku_c23012_32893918	1A	518064599	518064799	perfect match
BS00022158_51	1A	518064679	518064779	perfect match
Excalibur_c44668_382	1A	518143727	518143627	perfect match
AX-94668573	1A	518252686	518252588	98.99
AX-110360729	1A	518456883	518456785	98.99
AX-158536790	1A	518460588	518460686	98.99
AX-109851721	1A	518464502	518464600	98.99
AX-94661184	1A	518466527	518466457	perfect match
BobWhite_c11946_277	1A	518471926	518472026	98.02
BS00022788_51	1A	518472005	518471905	perfect match
AX-89430092	1A	518786272	518786370	98.99
AX-158536788	1A	519061682	519061780	98.99
AX-158560553	1A	519155413	519155315	98.99
Excalibur_c1845_4911	1A	519161329	519161229	perfect match
Ra_c24793_726	1A	519162483	519162583	perfect match
RAC875_c12993_201	1A	519168084	519167984	perfect match
RAC875_c12993_127	1A	519168158	519168058	perfect match
AX-95630766	1A	519168821	519168723	98.99
RAC875_c45115_509	1A	519169557	519169657	98.02
wsnp_Ex_c9722_16062937	1A	521206435	521206235	perfect match
AX-158569071	1A	521552903	521553001	98.99
AX-109865037	1A	522092119	522092021	98.99
IAAV2694	1A	522145988	522146175	98.936
BobWhite_c12977_65	1A	522308995	522309095	perfect match
Excalibur_c49946_169	1A	523004618	523004519	98
AX-158568558	1A	523347153	523347055	98.99
AX-158569223	1A	523432773	523432675	98.99
AX-109333061	1A	523953426	523953524	98.99
BS00039378_51	1A	524212458	524212358	98.02
BS00065430_51	1A	525814568	525814668	perfect match
AX-158605194	1A	528706410	528706312	98.99
Tdurum_contig11896_550	1A	529633187	529633287	perfect match
wsnp_Ku_c5210_9289260	1A	529633328	529633528	99.005
BS00062876_51	1A	531454475	531454375	perfect match
wsnp_Ex_c43228_49605281	1A	531837590	531837790	perfect match
CAP7_c1891_230	1A	531841151	531841051	perfect match
BS00009808_51	1A	531896561	531896660	98
GENE-0527_92	1A	533279611	533279711	perfect match
BobWhite_c96_170	1A	533356778	533356878	perfect match
Excalibur_c8301_1555	1A	533359090	533359190	98.02
AX-89503471	1A	533394285	533394383	98.99
AX-109384956	1A	533498378	533498476	98.99
AX-109936176	1A	533554208	533554110	98.99
AX-158602974	1A	533936188	533936286	98.99
AX-158556604	1A	534446193	534446291	98.99
AX-94440483	1A	534517282	534517212	perfect match
AX-158595435	1A	534620537	534620635	98.99
wsnp_Ku_c33917_43336069	1A	534623267	534623467	99.005
BobWhite_c26122_129	1A	534841108	534841208	perfect match
AX-94681397	1A	534847909	534847839	perfect match
AX-95151567	1A	534848075	534848173	98.99
BS00028146_51	1A	535144086	535144186	perfect match
AX-95629171	1A	535146217	535146315	98.99
RAC875_c15975_1208	1A	535599699	535599599	perfect match
AX-95198133	1A	535746631	535746561	perfect match
AX-158539767	1A	535980398	535980300	98.99
AX-94502624	1A	535985195	535985125	perfect match
wsnp_CAP7_c3472_1623955	1A	535991198	535991387	99.474
AX-110515143	1A	535995096	535995194	98.99
AX-158539768	1A	535995305	535995403	98.99
AX-95218032	1A	536014313	536014383	perfect match
BS00012042_51	1A	536014354	536014454	perfect match
AX-158539764	1A	536215383	536215481	98.99
AX-95159844	1A	536243768	536243698	perfect match
AX-158569055	1A	536648781	536648879	98.99
BS00110130_51	1A	536736663	536736763	perfect match
AX-158568864	1A	536745251	536745153	98.99
AX-158568880	1A	536771242	536771340	98.99
wsnp_BG606986A_Ta_2_1	1A	537021418	537021298	perfect match
AX-158544645	1A	537022200	537022298	98.99
RAC875_c25814_361	1A	537029987	537029887	perfect match
BS00022396_51	1A	537140245	537140145	perfect match
RAC875_c6798_467	1A	538128388	538128488	98.02
BS00109991_51	1A	538136301	538136401	perfect match
BS00022261_51	1A	538136401	538136301	perfect match
BS00110627_51	1A	538136453	538136353	perfect match
AX-158537485	1A	538310048	538309950	98.99
GENE-0262_431	1A	538310451	538310351	perfect match
AX-158556627	1A	538328357	538328455	98.99
AX-108832686	1A	538362364	538362266	98.99
AX-95146857	1A	538625510	538625580	perfect match
AX-158560411	1A	538625840	538625742	98.99
AX-158556632	1A	538625957	538625859	98.99
RAC875_c56690_320	1A	538645024	538644924	perfect match
Excalibur_c47013_1503	1A	538649766	538649866	perfect match
BS00073413_51	1A	538767578	538767678	perfect match
RAC875_c120509_133	1A	539039359	539039459	perfect match
wsnp_Ra_c22110_31550370	1A	539221051	539221251	perfect match
RAC875_c23168_480	1A	539646990	539647088	98.99
GENE-0069_468	1A	539656303	539656203	perfect match
Excalibur_c97157_65	1A	541458652	541458552	98.02
Tdurum_contig21114_255	1A	541655143	541655243	perfect match
Kukri_c24570_282	1A	541719513	541719413	perfect match
AX-111654095	1A	541802978	541803076	98.99
IACX5994	1A	541806417	541806298	perfect match
wsnp_Ex_c33452_41938159	1A	541806424	541806624	perfect match
wsnp_JD_c3973_5044238	1A	541898273	541898073	perfect match
RAC875_rep_c72890_63	1A	541899424	541899324	perfect match
AX-158537481	1A	541903470	541903372	98.99
AX-89552689	1A	541908360	541908262	98.99
AX-158555522	1A	541951970	541952068	98.99
Ra_c110766_321	1A	542091012	542091112	perfect match
AX-158539843	1A	542093026	542092928	98.99
Ku_c8992_405	1A	542157334	542157234	perfect match
AX-89373031	1A	542399866	542399964	98.99
AX-158569311	1A	542638554	542638652	98.99
wsnp_Ex_rep_c102067_87314043	1A	543216432	543216232	99.005
RAC875_rep_c105766_652	1A	543216728	543216828	perfect match
Tdurum_contig56158_60	1A	543378204	543378304	perfect match
RAC875_c12348_720	1A	543379674	543379574	perfect match
TGWA25K-TG0203	1A	543379674	543379576	98.99
AX-158560577	1A	543455770	543455672	98.99
AX-111159764	1A	543735873	543735971	98.99
AX-94585050	1A	543738137	543738207	perfect match
AX-158544631	1A	543744412	543744510	98.99
wsnp_Ex_c28900_37982485	1A	543746472	543746272	perfect match
GENE-0033_233	1A	543749525	543749425	perfect match
wsnp_BE443588A_Ta_2_2	1A	543882844	543882964	98.347
AX-158569244	1A	544179232	544179330	98.99
Tdurum_contig96086_74	1A	544568404	544568304	98.02
BobWhite_c41272_159	1A	544568434	544568334	98.02
AX-94480220	1A	544921376	544921446	perfect match
AX-109861530	1A	545667242	545667340	98.99
Kukri_s117372_152	1A	545697482	545697581	98.02
BS00095510_51	1A	545698950	545699050	perfect match
AX-111482033	1A	545788000	545788098	98.99
AX-111593746	1A	545788762	545788860	98.99
AX-110404143	1A	545789663	545789761	98.99
wsnp_CAP11_c1815_982483	1A	545791808	545791997	98.947
AX-94467726	1A	545792805	545792735	perfect match
BS00078085_51	1A	545793072	545793172	perfect match
AX-94400729	1A	545863464	545863394	perfect match
AX-158544473	1A	545877134	545877232	98.99
RAC875_c32379_216	1A	545897759	545897659	98.02
BS00070580_51	1A	545907654	545907554	perfect match
AX-94402881	1A	545907760	545907662	98.99
AX-94532291	1A	545907776	545907706	perfect match
TA005289-1104	1A	545940125	545940178	perfect match
BS00023203_51	1A	546114887	546114987	perfect match
BS00066278_51	1A	546167956	546167856	98.02
BS00064349_51	1A	546167958	546167858	perfect match
AX-158568847	1A	546321426	546321328	98.99
AX-89742048	1A	546321881	546321783	98.99
IACX14	1A	546340590	546340470	perfect match
AX-95162673	1A	547249658	547249588	perfect match
Ra_c29200_300	1A	547760209	547760309	perfect match
AX-94969179	1A	548222762	548222832	perfect match
wsnp_BE494527A_Ta_2_1	1A	549060691	549060571	perfect match
AX-158568841	1A	549263120	549263218	98.99
AX-110956771	1A	549700405	549700307	98.99
wsnp_Ex_c28149_37293173	1A	549721798	549721598	99.005
AX-94682772	1A	549723440	549723510	perfect match
AX-95249324	1A	550156534	550156604	perfect match
AX-158544495	1A	552000935	552000837	98.99
BobWhite_rep_c49755_131	1A	552238722	552238822	perfect match
BS00030043_51	1A	552336879	552336979	perfect match
BS00066212_51	1A	552938848	552938948	97.059
Ra_c5683_1762	1A	553348702	553348602	perfect match
AX-89613797	1A	553659145	553659243	98.99
Tdurum_contig11077_122	1A	553894849	553894949	perfect match
AX-158568870	1A	558338564	558338466	98.99
AX-110945528	1A	558825115	558825213	98.99
wsnp_BF474340A_Ta_2_1	1A	558926593	558926713	perfect match
RAC875_c15593_1421	1A	558926773	558926673	perfect match
AX-158569280	1A	559098160	559098062	98.99
AX-94948241	1A	559139605	559139675	perfect match
AX-158605771	1A	559542812	559542714	98.99
AX-109348426	1A	559865196	559865294	98.99
AX-158568868	1A	560562634	560562536	98.99
AX-158569265	1A	560568622	560568524	98.99
AX-94618000	1A	564981988	564982058	perfect match
AX-94761084	1A	566474085	566474155	perfect match
AX-158544504	1A	566589282	566589184	98.99
AX-158555485	1A	566594779	566594681	98.99
Excalibur_c1936_1072	1A	566945265	566945165	perfect match
AX-158555480	1A	569390303	569390205	98.99
AX-158555535	1A	571177858	571177760	98.99
Kukri_c51781_199	1A	572012526	572012426	perfect match
CAP12_c8163_118	1A	572974175	572974275	perfect match
AX-95077803	1A	573455866	573455936	perfect match
BobWhite_c9091_160	1A	574106462	574106562	perfect match
BobWhite_c37358_208	1A	575563840	575563740	perfect match
BS00070560_51	1A	575564823	575564923	perfect match
BobWhite_c44164_402	1A	575792247	575792347	perfect match
AX-158536782	1A	575983464	575983366	98.99
Excalibur_c66_147	1A	576120561	576120661	perfect match
Tdurum_contig81011_244	1A	576120656	576120756	98.02
wsnp_Ra_c36089_44508724	1A	577099494	577099694	perfect match
AX-108948487	1A	577712664	577712566	98.99
AX-108819088	1A	577954534	577954436	98.99
AX-94463854	1A	577955219	577955149	perfect match
AX-111158935	1A	578121070	578121168	98.99
AX-94465963	1A	578264697	578264627	perfect match
AX-158568840	1A	578570020	578569922	98.99
GENE-0115_375	1A	578594279	578594179	perfect match
AX-95139868	1A	578985313	578985243	perfect match
AX-158560331	1A	580393762	580393664	98.99
AX-95137931	1A	580533493	580533563	perfect match
AX-89462272	1A	580538247	580538149	98.99
wsnp_Ex_c18499_27344859	1A	580651090	580651288	98.507
AX-158537419	1A	581027426	581027524	98.99
AX-94503114	1A	581214558	581214488	perfect match
AX-158537421	1A	581222252	581222350	98.99
BS00022824_51	1A	581225660	581225560	perfect match
AX-111123655	1A	581247581	581247483	98.99
AX-158569206	1A	581552696	581552794	98.99
wsnp_Ex_c9343_15514687	1A	581589911	581589711	perfect match
wsnp_Ex_c9343_15514531	1A	581590067	581589867	99.005
AX-158569204	1A	581622338	581622436	98.99
AX-109380588	1A	581764260	581764162	98.99
AX-110591891	1A	582044987	582044889	98.99
AX-111131761	1A	582564668	582564570	98.99
AX-158539929	1A	583418343	583418441	98.99
AX-110395760	1A	583418724	583418822	98.99
AX-109338741	1A	583419109	583419207	98.99
wsnp_Ex_c3201_5910642	1A	583420775	583420575	99.005
AX-94430594	1A	583519976	583520046	perfect match
GENE-0514_210	1A	584183498	584183571	perfect match
AX-158605698	1A	584506100	584506002	98.99
AX-94760290	1A	584742040	584742110	perfect match
AX-158556608	1A	584749665	584749567	98.99
AX-158556606	1A	584750431	584750333	98.99
AX-158556607	1A	584750671	584750573	98.99
AX-95160390	1A	586115211	586115141	perfect match
AX-94945293	1A	586652754	586652684	perfect match
AX-158569026	1A	586999855	586999757	98.99
AX-158555540	1A	587055686	587055784	98.99
Kukri_c19837_432	1A	587064047	587063947	perfect match
BS00065170_51	1A	587103269	587103369	perfect match
RAC875_rep_c71278_345	1A	587218122	587218022	perfect match
BS00011892_51	1A	587218915	587219015	perfect match
wsnp_Ex_c15377_23637176	1A	587640452	587640652	99.005
AX-158569251	1A	587780207	587780109	98.99
RAC875_c62550_470	1A	588236741	588236841	perfect match
AX-89427262	1A	588411375	588411473	98.99
AX-94521760	1A	588807646	588807576	perfect match
BS00056823_51	1A	588817299	588817199	perfect match
BobWhite_c20073_382	1A	589012358	589012458	perfect match
AX-94664571	1A	589021294	589021224	perfect match
AX-94592638	1A	589021367	589021297	perfect match
AX-158536813	1A	590146270	590146172	98.99
AX-108914743	1A	591033538	591033440	98.99
BS00070991_51	1A	591228370	591228470	perfect match
AX-95151237	1A	591228776	591228706	perfect match
BS00070695_51	1A	591228901	591228801	perfect match
AX-111698963	1A	591229433	591229531	98.99
BS00011947_51	1A	591266733	591266633	perfect match
AX-109372762	1A	591673764	591673666	98.99
GENE-0543_201	1A	592206594	592206690	97.938
IAAV8446	1A	592379090	592378890	perfect match
RAC875_c8503_644	1A	592865898	592865998	perfect match
BS00011508_51	1A	592866037	592866137	perfect match
AX-158556621	1A	593448322	593448420	98.99
BobWhite_c33208_98	1A	593463431	593463331	perfect match
BobWhite_c44947_277	1A	593583854	593583754	perfect match
AX-111471275	1A	593608260	593608358	98.99
BS00059313_51	1A	594181065	594181165	perfect match
AX-111098763	1A	594182564	594182662	98.99
AX-89575429	1A	594184265	594184363	98.99
AX-158555502	1A	594566970	594566872	98.99
AX-94450565	1A	594903724	594903654	perfect match
AX-158569209	1A	595027668	595027766	98.99
AX-158605601	1A	595211945	595211847	98.99
AX-110508887	1A	595654316	595654218	98.99
RAC875_c85550_73	1A	595703006	595703106	98.02
CAP11_c1115_150	1A	595709269	595709169	perfect match
AX-111564213	1A	595709985	595709887	98.99
AX-158569035	1A	596153594	596153692	98.99
BS00021780_51	1A	596511057	596511157	perfect match
AX-94942875	1A	596649882	596649812	perfect match
wsnp_Ex_c46670_52108070	1A	596872682	596872482	99.005
AX-158556633	1A	597326683	597326781	98.99
AX-94788925	1A	597851184	597851254	perfect match
Excalibur_rep_c71271_247	1A	597853885	597853985	perfect match
wsnp_Ex_c2918_5381441	1A	597853899	597854099	perfect match
AX-111467128	1A	598089072	598089170	98.99
Tdurum_contig47006_2711	1A	598115589	598115689	perfect match
BS00022180_51	1B	1195982	1195882	perfect match
BS00093078_51	1B	1196041	1195941	perfect match
Kukri_c44369_131	1B	1407756	1407656	perfect match
Excalibur_c21898_1423	1B	1409078	1409178	perfect match
BS00050522_51	1B	1421715	1421615	perfect match
BS00071161_51	1B	1520547	1520647	perfect match
BS00076192_51	1B	1766304	1766204	perfect match
Kukri_c79308_278	1B	4508194	4508094	perfect match
AX-158540295	1B	4532360	4532262	98.99
BS00022504_51	1B	4533010	4532910	perfect match
BS00022505_51	1B	4534525	4534425	perfect match
AX-158540320	1B	5613725	5613823	98.99
BS00022482_51	1B	5631303	5631403	perfect match
TG0047	1B	6886244	6885965	99.286
AX-95259195	1B	6925971	6926041	perfect match
AX-158521438	1B	7308229	7308327	98.99
AX-158607148	1B	7480339	7480241	98.99
Excalibur_c43567_850	1B	8526583	8526683	perfect match
AX-94454402	1B	9436613	9436543	perfect match
wsnp_BE405749B_Ta_2_1	1B	9599630	9599510	perfect match
TGWA25K-TG0220	1B	9599630	9599510	98.347
Kukri_c36151_170	1B	10071547	10071647	perfect match
Kukri_c92979_195	1B	10224119	10224019	perfect match
AX-94997422	1B	10515655	10515585	perfect match
Tdurum_contig47083_278	1B	10638583	10638683	98.02
wsnp_BE637971B_Ta_1_20	1B	10738669	10738550	98.333
AX-94692514	1B	12155936	12156006	perfect match
BS00004903_51	1B	12156145	12156245	perfect match
IACX3811	1B	12378807	12378926	perfect match
AX-158607271	1B	12879640	12879542	98.99
BS00064829_51	1B	13310025	13309925	perfect match
AX-94759371	1B	14908627	14908697	perfect match
Tdurum_contig58525_304	1B	14913664	14913564	perfect match
AX-158540316	1B	15769549	15769647	98.99
AX-158545235	1B	15838292	15838194	98.99
IAAV2147	1B	15870254	15870054	perfect match
BS00105846_51	1B	16010732	16010832	perfect match
AX-158570866	1B	16091714	16091812	98.99
BS00108058_51	1B	16161478	16161378	perfect match
BS00108057_51	1B	16161484	16161384	perfect match
BS00089524_51	1B	16170350	16170250	perfect match
AX-94602901	1B	16170612	16170542	perfect match
BS00011695_51	1B	16466492	16466392	perfect match
AX-108893457	1B	16467351	16467449	98.99
AX-158540300	1B	18174254	18174352	98.99
AX-94570104	1B	18206466	18206536	perfect match
AX-94800893	1B	18549573	18549643	perfect match
Tdurum_contig78972_316	1B	19235254	19235354	98.02
AX-158557069	1B	19875369	19875271	98.99
TGWA25K-TG0215	1B	21384172	21384074	98.99
Tdurum_contig50667_306	1B	21384174	21384074	perfect match
AX-111603368	1B	22290018	22290116	98.99
BS00110121_51	1B	22890447	22890347	perfect match
AX-95241426	1B	22984910	22985010	perfect match
AX-95234532	1B	23177821	23177751	perfect match
Excalibur_c3270_1566	1B	25179776	25179876	perfect match
wsnp_Ku_c2620_4980121	1B	28019066	28018866	perfect match
wsnp_Ex_c5780_10153638	1B	28019446	28019646	perfect match
Tdurum_contig44861_1253	1B	28020014	28020114	perfect match
AX-158570920	1B	28162769	28162671	98.99
Tdurum_contig61324_305	1B	30413280	30413180	perfect match
Tdurum_contig56188_569	1B	30414873	30414773	perfect match
IAAV7541	1B	30414939	30414781	perfect match
Tdurum_contig9874_547	1B	34942521	34942421	98.02
AX-94484295	1B	34952121	34952051	perfect match
AX-158532167	1B	36473719	36473621	98.99
AX-94796921	1B	42038871	42038801	perfect match
BS00065053_51	1B	43205854	43205954	perfect match
AX-158570941	1B	43275183	43275281	98.99
BS00022590_51	1B	43284072	43284172	perfect match
AX-158561105	1B	43767137	43767039	98.99
BS00067003_51	1B	43915169	43915069	perfect match
IAAV2838	1B	46089077	46088877	perfect match
BS00065005_51	1B	46580804	46580704	perfect match
Tdurum_contig9762_314	1B	46915059	46914959	perfect match
Excalibur_c95656_129	1B	50083630	50083530	perfect match
wsnp_Ra_c19335_28504388	1B	52075553	52075353	perfect match
RFL_Contig2160_617	1B	52131117	52131217	perfect match
RAC875_c90169_393	1B	52753017	52752917	98.02
IAAV8952	1B	55180145	55180021	perfect match
IACX502	1B	55480762	55480882	98.347
BS00087784_51	1B	56068872	56068972	perfect match
Ra_c16879_977	1B	57781181	57781081	98.02
wsnp_Ex_c12063_19310114	1B	58404947	58405147	99.005
AX-94413562	1B	58405333	58405403	perfect match
Tdurum_contig26281_139	1B	58750447	58750347	perfect match
Tdurum_contig82187_189	1B	58751214	58751114	perfect match
TGWA25K-TG0314	1B	59627594	59627692	98.99
Kukri_c18006_1568	1B	61804113	61804013	98.02
RAC875_c8271_1352	1B	61804346	61804246	perfect match
wsnp_Ku_c11987_19473636	1B	61805302	61805102	99.005
Kukri_c23300_267	1B	62368394	62368294	perfect match
Tdurum_contig75938_1546	1B	62491573	62491673	perfect match
BS00110546_51	1B	62572950	62572850	perfect match
AX-94648555	1B	62864341	62864271	perfect match
AX-109946561	1B	63112075	63112173	98.99
wsnp_CAP8_c4576_2228073	1B	63196617	63196417	perfect match
AX-158595824	1B	63259382	63259284	98.99
RAC875_rep_c109416_191	1B	63893121	63893021	perfect match
CAP8_rep_c9642_82	1B	63893320	63893420	perfect match
Excalibur_c17202_1833	1B	63893763	63893863	perfect match
AX-94835306	1B	64247309	64247239	perfect match
AX-158570978	1B	64746556	64746458	98.99
wsnp_Ex_c2111_3963161	1B	65166150	65166350	perfect match
AX-94990715	1B	65896793	65896863	perfect match
wsnp_Ex_c25782_35041189	1B	68840164	68839964	99.005
AX-158521565	1B	72826245	72826147	98.99
BS00022902_51	1B	73310832	73310732	perfect match
AX-158521551	1B	73847745	73847843	98.99
Kukri_c3414_114	1B	73851627	73851527	perfect match
AX-158521483	1B	74016118	74016216	98.99
Kukri_rep_c107771_588	1B	74016857	74016757	perfect match
AX-158570814	1B	74149793	74149695	98.99
AX-108967134	1B	74506858	74506760	98.99
BS00083533_51	1B	75661021	75661120	99
Kukri_c5861_360	1B	76079727	76079827	perfect match
AX-158521482	1B	79522350	79522448	98.99
AX-158557026	1B	83043035	83043133	98.99
AX-158557037	1B	83376755	83376657	98.99
AX-158561131	1B	83464156	83464254	98.99
AX-158521560	1B	92508055	92508153	98.99
BS00093231_51	1B	92540435	92540335	perfect match
RFL_Contig529_963	1B	92540644	92540544	perfect match
TA004123-0331	1B	93461240	93461187	perfect match
RAC875_c82888_83	1B	93699054	93699154	perfect match
AX-158570811	1B	93839754	93839656	98.99
AX-158521555	1B	95088548	95088450	98.99
AX-94431524	1B	96905942	96906012	perfect match
TGWA25K-TG0313	1B	97144291	97144389	98.99
IAAV2366	1B	97762406	97762545	perfect match
AX-94839474	1B	99132033	99132103	perfect match
AX-158521473	1B	100170663	100170565	98.99
IAAV9176	1B	100170714	100170875	perfect match
Excalibur_c20610_251	1B	100481094	100481194	perfect match
wsnp_Ex_c27136_36355033	1B	101085271	101085471	99.005
RAC875_c63067_283	1B	101943166	101943066	perfect match
Kukri_c43552_443	1B	102024821	102024721	perfect match
TA003421-0429	1B	102876119	102876066	perfect match
IAAV6464	1B	102876312	102876146	98.802
IAAV2324	1B	103659585	103659434	98.684
AX-95162694	1B	106436912	106436842	perfect match
BS00086576_51	1B	113019457	113019557	perfect match
RAC875_c28894_526	1B	113046046	113046146	perfect match
BS00049927_51	1B	115087768	115087868	perfect match
TG0126	1B	115973468	115973568	perfect match
wsnp_Ex_c11976_19193550	1B	115974749	115974949	99.005
Ku_c5960_496	1B	118433279	118433179	perfect match
AX-94490145	1B	119791081	119791151	perfect match
Kukri_c17540_394	1B	121491166	121491266	perfect match
Ra_c455_283	1B	123383712	123383812	perfect match
Ku_c3695_1696	1B	123392369	123392469	perfect match
wsnp_Ku_c3695_6810121	1B	123392477	123392677	perfect match
Kukri_c29582_126	1B	124728945	124728845	perfect match
Ku_c11706_149	1B	125265801	125265701	perfect match
RAC875_c60360_389	1B	126092977	126093077	perfect match
IAAV7043	1B	126611912	126611712	perfect match
BS00093740_51	1B	127088940	127088840	perfect match
BS00093736_51	1B	127089077	127088977	perfect match
AX-94923277	1B	127607847	127607917	perfect match
RAC875_c8849_134	1B	130128078	130127978	perfect match
RAC875_c47137_112	1B	136451767	136451867	98.02
AX-95173872	1B	136453147	136453047	perfect match
AX-158540281	1B	139507382	139507480	98.99
BS00073034_51	1B	142998950	142999050	perfect match
AX-94549074	1B	145626304	145626374	perfect match
wsnp_BE399980B_Ta_2_1	1B	148848610	148848730	perfect match
wsnp_Ku_c230_460618	1B	150716902	150716702	perfect match
BS00063574_51	1B	151195672	151195772	perfect match
BS00035690_51	1B	151248026	151248126	perfect match
AX-95208619	1B	151666436	151666506	perfect match
AX-158556949	1B	152620792	152620890	98.99
BS00090553_51	1B	154758515	154758415	perfect match
AX-89408440	1B	154794245	154794343	98.99
BS00003575_51	1B	155216329	155216429	perfect match
BS00068512_51	1B	159323794	159323894	perfect match
BS00068246_51	1B	162804866	162804966	perfect match
BS00022218_51	1B	163104273	163104173	perfect match
AX-158540319	1B	163136657	163136559	98.99
wsnp_BE443531B_Ta_1_1	1B	163225664	163225784	perfect match
BS00066165_51	1B	164434858	164434758	perfect match
Tdurum_contig42092_348	1B	165719010	165719110	98.02
BS00022625_51	1B	169609143	169609043	perfect match
AX-86183558	1B	175158228	175158326	98.99
AX-158556915	1B	175278405	175278307	98.99
AX-110422876	1B	177561969	177561871	98.99
RAC875_rep_c72356_51	1B	184579479	184579579	perfect match
AX-158561162	1B	196013369	196013271	98.99
AX-158555575	1B	196714248	196714346	98.99
AX-158561091	1B	202540733	202540635	98.99
wsnp_BE637864B_Ta_1_1	1B	206017919	206018039	perfect match
AX-94470119	1B	206539649	206539719	perfect match
AX-110434413	1B	207340552	207340454	98.99
AX-94668903	1B	208443172	208443242	perfect match
AX-94839011	1B	218794055	218794125	perfect match
Kukri_c147_1620	1B	218795266	218795366	perfect match
BS00022317_51	1B	224277286	224277186	perfect match
AX-158561110	1B	231408399	231408497	98.99
AX-110035800	1B	232460587	232460685	98.99
AX-95108394	1B	233881976	233882046	perfect match
AX-94993597	1B	235570634	235570704	perfect match
Kukri_rep_c105316_262	1B	237014698	237014598	perfect match
GENE-0431_601	1B	240312495	240312591	97.938
AX-109447012	1B	246569003	246569101	98.99
AX-109342634	1B	265108644	265108546	98.99
AX-111514779	1B	271683038	271683136	98.99
AX-158521268	1B	275193816	275193718	98.99
AX-158545094	1B	283930031	283929933	98.99
AX-110385663	1B	283934550	283934452	98.99
AX-158545071	1B	284428562	284428660	98.99
Excalibur_c6497_535	1B	284939025	284939125	perfect match
BS00065139_51	1B	288874196	288874096	98.02
AX-111565329	1B	289561781	289561683	98.99
BS00050126_51	1B	291774354	291774255	99
GENE-0379_108	1B	293035998	293035898	perfect match
AX-95194781	1B	293131806	293131736	perfect match
AX-110936551	1B	295057480	295057578	98.99
AX-110366212	1B	295057557	295057655	98.99
TGWA25K-TG0278	1B	295212431	295212631	99.005
AX-109371985	1B	297288555	297288653	98.99
BobWhite_rep_c66146_237	1B	303506961	303507061	perfect match
Tdurum_contig31624_230	1B	304116639	304116539	98.02
BS00067247_51	1B	304478249	304478149	perfect match
AX-111484333	1B	305825703	305825801	98.99
IACX7921	1B	306347346	306347146	perfect match
AX-158560863	1B	306697582	306697484	98.99
Ra_c7745_1438	1B	307620995	307620895	98.02
AX-95659131	1B	307620995	307620897	98.99
IAAV5269	1B	309416980	309417180	99.005
IAAV7260	1B	310853135	310853031	perfect match
Tdurum_contig13391_680	1B	311605103	311605003	perfect match
Tdurum_contig60809_268	1B	314905790	314905690	perfect match
Tdurum_contig43346_108	1B	315806404	315806304	perfect match
Ra_c16069_1820	1B	316677513	316677613	perfect match
BobWhite_c13761_242	1B	319569717	319569815	98.99
Kukri_c84940_106	1B	319777347	319777447	98.02
AX-108954609	1B	320882174	320882272	98.99
Tdurum_contig31201_380	1B	321691543	321691443	perfect match
Excalibur_c15885_1145	1B	323662810	323662910	perfect match
AX-158540117	1B	324143981	324143883	98.99
AX-95143224	1B	327527287	327527217	perfect match
Ex_c6028_1602	1B	329214569	329214469	perfect match
AX-158560856	1B	329224583	329224485	98.99
AX-111083507	1B	329225891	329225793	98.99
AX-94467830	1B	329890387	329890457	perfect match
AX-110010230	1B	331572999	331572901	98.99
Tdurum_contig45715_549	1B	331575449	331575549	98.02
Tdurum_contig45715_1246	1B	331576146	331576246	perfect match
Excalibur_c18876_334	1B	331576265	331576165	98.02
wsnp_Ku_c2115_4089288	1B	331578823	331578623	perfect match
AX-94616791	1B	332105039	332105109	perfect match
AX-95171339	1B	332105053	332105123	perfect match
wsnp_Ex_c5947_10431109	1B	333054338	333054538	perfect match
Excalibur_c51643_145	1B	333296813	333296913	perfect match
RAC875_c21274_235	1B	333502231	333502131	perfect match
AX-108962827	1B	334106511	334106609	98.99
CAP7_c1241_128	1B	334696423	334696323	98.02
tplb0029b01_123	1B	334892210	334892310	perfect match
BobWhite_c1456_615	1B	334892539	334892439	perfect match
AX-110500129	1B	334893408	334893310	98.99
AX-158556827	1B	335241242	335241340	98.99
AX-158603119	1B	336017061	336016963	98.99
AX-110049705	1B	338305477	338305575	98.99
AX-108815692	1B	338504372	338504470	98.99
AX-94433968	1B	339553626	339553556	perfect match
GENE-0075_140	1B	339722858	339722958	perfect match
Kukri_c49091_415	1B	340467180	340467280	98.02
RAC875_c22244_61	1B	340532305	340532205	98.02
AX-110567630	1B	342005783	342005881	98.99
RAC875_c44575_561	1B	342290980	342290880	perfect match
wsnp_Ku_c30982_40765254	1B	342430277	342430477	99.005
AX-95166038	1B	342998384	342998454	perfect match
AX-111472228	1B	344814164	344814262	98.99
AX-158556784	1B	344814234	344814332	98.99
wsnp_Ex_c38116_45719983	1B	346582381	346582181	perfect match
TGWA25K-TG0251	1B	346582381	346582181	99.005
IACX8300	1B	348129766	348129572	98.974
IACX1008	1B	348844422	348844542	perfect match
GENE-0405_237	1B	348844490	348844590	perfect match
BS00022687_51	1B	350234218	350234118	perfect match
RAC875_c42206_305	1B	353750163	353750263	perfect match
TGWA25K-TG0292	1B	353750313	353750113	99.005
AX-158556865	1B	354585585	354585487	98.99
Ku_c17486_152	1B	354964085	354964185	perfect match
wsnp_Ex_c7629_13033231	1B	354965418	354965218	perfect match
AX-158537613	1B	355510111	355510209	98.99
AX-94546683	1B	358596212	358596282	perfect match
AX-94538713	1B	362433146	362433076	perfect match
AX-158560868	1B	365088377	365088475	98.99
Tdurum_contig61425_242	1B	365321880	365321780	perfect match
BS00022490_51	1B	366018379	366018479	perfect match
Tdurum_contig51348_326	1B	369586593	369586693	perfect match
wsnp_Ex_c26419_35667216	1B	370523480	370523680	perfect match
Ra_c23839_884	1B	373524523	373524623	perfect match
GENE-0193_197	1B	373525362	373525462	perfect match
TGWA25K-TG0296	1B	374616277	374616477	99.005
TGWA25K-TG0298	1B	376102524	376102724	99.005
Ku_c42700_2798	1B	377515877	377515977	perfect match
Kukri_c37856_123	1B	379204457	379204357	perfect match
Kukri_c76762_166	1B	380392124	380392224	perfect match
AX-158556893	1B	381931031	381931129	98.99
BS00029345_51	1B	386936447	386936347	perfect match
Tdurum_contig84184_124	1B	387436049	387435949	perfect match
Kukri_rep_c70738_896	1B	388259026	388259126	perfect match
Tdurum_contig53888_350	1B	388263389	388263489	perfect match
BS00041010_51	1B	388264518	388264418	perfect match
AX-158537668	1B	390333193	390333291	98.99
AX-110026671	1B	390530915	390530817	98.99
BS00052075_51	1B	391192140	391192040	perfect match
BS00052089_51	1B	391192268	391192168	perfect match
Tdurum_contig46780_203	1B	393313402	393313302	perfect match
CAP7_c302_518	1B	394008383	394008283	98.02
TA013367-0455	1B	399521298	399521351	perfect match
AX-95174732	1B	402375732	402375662	perfect match
BS00021947_51	1B	411990752	411990652	98.02
BS00021946_51	1B	413892143	413892043	perfect match
Excalibur_c4163_387	1B	414591042	414590942	98.02
Tdurum_contig43910_687	1B	414616010	414615910	perfect match
JD_c64600_281	1B	415568365	415568465	perfect match
BS00067434_51	1B	415573704	415573604	perfect match
BS00022581_51	1B	419910139	419910039	perfect match
IACX2701	1B	425130350	425130469	perfect match
AX-95682068	1B	425131022	425130924	98.99
BS00110148_51	1B	425131156	425131056	perfect match
AX-158545099	1B	425879963	425879865	98.99
BS00071083_51	1B	426995861	426995961	perfect match
AX-158570087	1B	429089692	429089594	98.99
BS00038929_51	1B	429958190	429958090	perfect match
BS00075663_51	1B	429959268	429959168	perfect match
AX-158540065	1B	429966115	429966017	98.99
BS00070139_51	1B	430295310	430295410	perfect match
tplb0058h11_348	1B	430411706	430411806	perfect match
Excalibur_c59016_839	1B	431955920	431956020	perfect match
Tdurum_contig28305_106	1B	432843210	432843110	perfect match
BS00093841_51	1B	433939941	433939841	perfect match
AX-158521257	1B	435456301	435456203	98.99
AX-158520948	1B	435463581	435463679	98.99
IACX5764	1B	435566642	435566548	97.895
AX-158531994	1B	435569170	435569268	98.99
AX-89339341	1B	435630483	435630581	98.99
Tdurum_contig28530_380	1B	435841368	435841268	98.02
BS00078228_51	1B	436033260	436033160	perfect match
AX-94540417	1B	437318109	437318039	perfect match
BS00022089_51	1B	437318935	437318835	perfect match
BS00033681_51	1B	437969982	437970082	perfect match
AX-158570368	1B	438185406	438185308	98.99
AX-110943874	1B	438186776	438186678	98.99
AX-95204890	1B	438415629	438415559	perfect match
AX-158545011	1B	439280590	439280492	98.99
AX-108912270	1B	440178737	440178639	98.99
AX-108740343	1B	440270977	440271075	98.99
GENE-0136_82	1B	440405967	440405867	perfect match
AX-89417494	1B	443426040	443425942	98.99
BS00022324_51	1B	445054663	445054563	perfect match
TA003801-1144	1B	448148720	448148668	perfect match
AX-158545041	1B	448184597	448184499	98.99
AX-94917376	1B	449967973	449968043	perfect match
BS00022133_51	1B	449968776	449968876	perfect match
AX-158545044	1B	449974052	449973954	98.99
BS00073530_51	1B	450827138	450827238	perfect match
tplb0023b14_704	1B	451143430	451143330	perfect match
AX-89350924	1B	451144402	451144304	98.99
wsnp_Ra_c8484_14372772	1B	451396787	451396987	99.005
wsnp_Ex_c17452_26163496	1B	451397164	451397364	99.005
BS00073132_51	1B	453120007	453119907	perfect match
BS00032364_51	1B	453121165	453121265	perfect match
Tdurum_contig70304_781	1B	453277224	453277124	perfect match
AX-110395714	1B	454198428	454198330	98.99
wsnp_JD_c4485_5618761	1B	454252167	454252367	perfect match
Kukri_c4951_503	1B	455080005	455080105	perfect match
wsnp_Ku_c4951_8856170	1B	455083083	455083283	perfect match
AX-158545084	1B	455967216	455967118	98.99
wsnp_Ex_c22006_31180883	1B	457017967	457018167	perfect match
wsnp_Ex_c22006_31181239	1B	457018323	457018523	perfect match
Ku_c6201_2890	1B	458239148	458239248	perfect match
AX-110383861	1B	458663751	458663653	98.99
AX-94506427	1B	459442429	459442499	perfect match
AX-110030455	1B	460796306	460796208	98.99
wsnp_Ex_c852_1657319	1B	461114864	461115065	99.01
AX-94806190	1B	461115092	461115162	perfect match
BS00069723_51	1B	462152619	462152719	perfect match
AX-89441694	1B	462152719	462152621	98.99
AX-158540207	1B	462156607	462156705	98.99
AX-109283327	1B	462157735	462157833	98.99
wsnp_Ra_c2027_3945764	1B	462870218	462870018	99.005
wsnp_Ra_c2027_3945713	1B	462870269	462870069	99.005
RAC875_s105188_92	1B	462870611	462870711	perfect match
wsnp_Ex_c2025_3799847	1B	462870859	462871059	perfect match
RAC875_c865_1936	1B	462903878	462903978	perfect match
Ra_c3083_982	1B	463213675	463213775	perfect match
Kukri_c51474_334	1B	463271638	463271738	perfect match
wsnp_CAP7_c940_480745	1B	463353096	463353296	99.005
IAAV5704	1B	463353296	463353096	perfect match
BobWhite_c441_976	1B	463752109	463752009	perfect match
Ra_c45721_2630	1B	467173923	467173823	perfect match
Ku_c70461_480	1B	469401546	469401646	perfect match
BS00065533_51	1B	469413072	469412972	perfect match
wsnp_Ex_rep_c66883_65286958	1B	470588121	470587921	perfect match
BobWhite_c28635_785	1B	471463469	471463569	perfect match
AX-89360524	1B	471945910	471945812	98.99
AX-108974554	1B	471949148	471949050	98.99
AX-158570361	1B	475456891	475456793	98.99
IACX15424	1B	475828206	475828006	perfect match
BobWhite_c1967_388	1B	475852143	475852243	perfect match
AX-110459339	1B	476425712	476425614	98.99
AX-110418815	1B	477409744	477409842	98.99
Tdurum_contig56874_562	1B	477410496	477410596	perfect match
wsnp_RFL_Contig3866_4228783	1B	477735190	477735290	perfect match
AX-158570336	1B	477969939	477969841	98.99
Tdurum_contig60052_184	1B	479733506	479733406	perfect match
wsnp_Ku_c24323_34285350	1B	480319810	480320010	perfect match
Ra_c26829_375	1B	480461203	480461303	perfect match
AX-108774793	1B	480648249	480648151	98.99
Tdurum_contig44255_814	1B	482211388	482211488	perfect match
CAP7_c3456_113	1B	482226529	482226429	perfect match
BS00023142_51	1B	483079257	483079157	perfect match
Tdurum_contig15593_407	1B	483081069	483080969	perfect match
BS00034925_51	1B	483590801	483590901	perfect match
Tdurum_contig28316_442	1B	483590901	483590801	perfect match
Tdurum_contig28316_243	1B	483591100	483591000	perfect match
Tdurum_contig28316_228	1B	483591115	483591015	perfect match
RAC875_c56417_377	1B	483600279	483600377	98.99
wsnp_BE446240B_Ta_2_3	1B	483613184	483613304	98.347
TA004407-0898	1B	484247926	484247873	perfect match
AX-94597094	1B	486504211	486504281	perfect match
Ra_c68984_1882	1B	487146421	487146521	perfect match
AX-94982191	1B	488347419	488347349	perfect match
AX-158544992	1B	491438365	491438267	98.99
Tdurum_contig59449_249	1B	493550145	493550045	perfect match
Excalibur_c90096_77	1B	493631434	493631334	perfect match
AX-110383610	1B	494346140	494346238	98.99
GENE-0107_807	1B	494352564	494352664	perfect match
Tdurum_contig29363_461	1B	495265377	495265476	99
AX-158606630	1B	496026131	496026033	98.99
BS00041355_51	1B	496119633	496119733	perfect match
BS00022920_51	1B	498910360	498910260	perfect match
RAC875_c31261_367	1B	498984134	498984034	perfect match
IAAV6731	1B	499988058	499988258	perfect match
BS00022619_51	1B	500275399	500275499	perfect match
Ra_c37969_549	1B	500275492	500275592	perfect match
AX-108773996	1B	502297703	502297801	98.99
AX-89394630	1B	503225284	503225382	98.99
Tdurum_contig81102_102	1B	503872557	503872657	perfect match
Excalibur_c5218_75	1B	503890146	503890246	perfect match
AX-158570322	1B	507407504	507407602	98.99
AX-158544982	1B	509411663	509411565	98.99
AX-109363269	1B	511106636	511106734	98.99
AX-158560930	1B	511685975	511686073	98.99
AX-158606660	1B	514738247	514738149	98.99
AX-110008202	1B	516228993	516229091	98.99
AX-158520963	1B	516812642	516812544	98.99
AX-110475885	1B	516816881	516816979	98.99
wsnp_BE495786B_Ta_2_2	1B	516817667	516817547	perfect match
Tdurum_contig60509_232	1B	516998644	516998544	perfect match
wsnp_Ra_c29782_39115548	1B	516998960	516998760	perfect match
Kukri_c13188_256	1B	517230855	517230755	perfect match
AX-108937087	1B	518650480	518650578	98.99
AX-94692952	1B	518925815	518925745	perfect match
AX-158544898	1B	521071504	521071406	98.99
GENE-0004_635	1B	521466054	521466153	98.02
AX-158570189	1B	521929151	521929053	98.99
BS00022124_51	1B	522961298	522961398	perfect match
BS00028318_51	1B	522968537	522968637	perfect match
AX-110533435	1B	523107954	523107856	98.99
AX-95659642	1B	523923013	523923111	98.99
IACX10809	1B	524191037	524190837	perfect match
AX-111656815	1B	524193589	524193491	98.99
AX-158540101	1B	525318417	525318515	98.99
Tdurum_contig63834_340	1B	525426290	525426190	98.02
AX-94751447	1B	526595527	526595625	98.99
AX-111602485	1B	526597740	526597838	98.99
AX-89524094	1B	526804954	526805052	98.99
AX-158570152	1B	526905132	526905034	98.99
AX-109815681	1B	526913179	526913277	98.99
Excalibur_rep_c103109_88	1B	527027312	527027412	perfect match
RAC875_c6701_291	1B	527289877	527289777	perfect match
Kukri_c22155_1010	1B	527428850	527428750	perfect match
Tdurum_contig50473_889	1B	527727042	527727142	perfect match
AX-89490304	1B	528555092	528554994	98.99
AX-158560938	1B	528559775	528559873	98.99
AX-158570161	1B	529831816	529831914	98.99
BS00009270_51	1B	530740467	530740367	perfect match
wsnp_Ex_c1600_3051075	1B	530740997	530740797	perfect match
AX-89760660	1B	533132554	533132456	98.99
Ra_c25590_1406	1B	533572244	533572344	perfect match
Ra_c25590_1486	1B	533572324	533572424	98.02
wsnp_Ex_c1495_2864718	1B	533572535	533572735	99.005
AX-94490210	1B	533572603	533572533	perfect match
AX-158521181	1B	533954867	533954806	perfect match
AX-158521178	1B	534476296	534476394	98.99
AX-94504071	1B	534478052	534477982	perfect match
AX-158521149	1B	536028423	536028325	98.99
AX-158531937	1B	536205419	536205321	98.99
AX-158521147	1B	536206068	536205970	98.99
CAP12_c424_402	1B	536485890	536485990	perfect match
BS00022742_51	1B	536690298	536690198	perfect match
GENE-0410_71	1B	537100192	537100292	perfect match
BS00036362_51	1B	537105797	537105897	perfect match
Tdurum_contig31102_299	1B	537106072	537106172	perfect match
Kukri_c559_193	1B	537294746	537294646	perfect match
AX-158556737	1B	537401602	537401700	98.99
BS00010130_51	1B	537582206	537582106	perfect match
IACX11291	1B	537582403	537582239	perfect match
RAC875_s110519_303	1B	537582545	537582445	perfect match
AX-158521182	1B	537583482	537583384	98.99
Tdurum_contig87938_342	1B	537627454	537627354	perfect match
AX-94664843	1B	537789052	537789122	perfect match
AX-158531949	1B	537820692	537820594	98.99
IACX11029	1B	538777314	538777120	perfect match
BS00010399_51	1B	538777462	538777562	perfect match
Excalibur_c48379_461	1B	538780788	538780688	98.02
Ra_c62804_1641	1B	538780791	538780691	98.02
Excalibur_c48379_413	1B	538780836	538780736	98.02
Excalibur_c23992_436	1B	538783036	538782936	perfect match
Ex_c102909_778	1B	538786781	538786881	perfect match
AX-158531950	1B	541525029	541525127	98.99
RFL_Contig4977_2333	1B	542141759	542141659	perfect match
CAP12_c1129_220	1B	542392441	542392341	perfect match
AX-158531952	1B	543258259	543258357	98.99
AX-158531863	1B	543359435	543359337	98.99
AX-95182909	1B	545448291	545448361	perfect match
AX-94462466	1B	546030914	546030984	perfect match
Tdurum_contig32437_257	1B	546130980	546131080	perfect match
IACX3595	1B	546143963	546143844	perfect match
AX-158521219	1B	546237891	546237793	98.99
AX-158521033	1B	546937940	546937842	98.99
Kukri_c73734_175	1B	547312471	547312571	perfect match
Excalibur_c40993_1129	1B	547321658	547321758	98.02
wsnp_BF485168B_Ta_2_1	1B	547321886	547321766	perfect match
AX-110477406	1B	547322992	547323090	98.99
AX-158521142	1B	547635662	547635564	98.99
AX-94620208	1B	548753023	548753093	perfect match
AX-94744409	1B	549241379	549241449	perfect match
AX-109333618	1B	549338680	549338778	98.99
BS00038643_51	1B	549539451	549539351	perfect match
AX-158521124	1B	549542262	549542360	98.99
AX-94770609	1B	549543344	549543414	perfect match
wsnp_BG274294B_Ta_2_3	1B	549633367	549633247	perfect match
wsnp_Ex_c7447_12752449	1B	549702324	549702124	perfect match
wsnp_Ex_c7447_12751589	1B	549703184	549702984	perfect match
AX-158521150	1B	549706327	549706229	98.99
BS00048610_51	1B	549706529	549706429	perfect match
AX-94653005	1B	549799801	549799731	perfect match
AX-158521067	1B	550745492	550745590	98.99
RAC875_c32077_284	1B	550745673	550745773	perfect match
AX-158521152	1B	550748663	550748761	98.99
AX-89326139	1B	551232623	551232525	98.99
AX-110448009	1B	551738900	551738998	98.99
IAAV3567	1B	551947127	551946927	perfect match
Ku_c3647_2429	1B	551948003	551947903	perfect match
Tdurum_contig25457_175	1B	552383655	552383555	perfect match
BS00068083_51	1B	553007773	553007673	perfect match
AX-109518409	1B	554302746	554302844	98.99
Tdurum_contig892_633	1B	554310023	554310123	perfect match
Tdurum_contig64811_332	1B	554700087	554699987	perfect match
IAAV4729	1B	554919695	554919895	perfect match
RAC875_c3835_782	1B	555252359	555252259	perfect match
Ex_c402_1223	1B	555338954	555338854	perfect match
wsnp_Ex_c402_791233	1B	555339290	555339090	99.005
Tdurum_contig42797_2922	1B	555340205	555340305	perfect match
Tdurum_contig42797_3196	1B	555340479	555340579	perfect match
Excalibur_c17977_71	1B	555342322	555342422	perfect match
wsnp_Ku_c23096_32987510	1B	555342700	555342900	perfect match
Ku_c4348_862	1B	555390016	555389916	98.02
Tdurum_contig42749_3287	1B	555390914	555390814	perfect match
Tdurum_contig44540_510	1B	555394535	555394635	perfect match
RAC875_rep_c109215_398	1B	555610623	555610523	perfect match
Kukri_c66451_128	1B	555617414	555617514	perfect match
wsnp_Ex_c5245_9283053	1B	555619640	555619440	perfect match
AX-110940219	1B	555678772	555678674	98.99
wsnp_JD_c6331_7499060	1B	555682531	555682331	99.005
Kukri_c1918_1074	1B	555683055	555683155	perfect match
Excalibur_rep_c66322_448	1B	555684656	555684756	perfect match
AX-95198778	1B	555685837	555685907	perfect match
AX-94395353	1B	556169306	556169376	perfect match
AX-111082696	1B	556307292	556307390	98.99
AX-158570553	1B	556322959	556322861	98.99
AX-94526541	1B	556421715	556421785	perfect match
AX-109882902	1B	556503284	556503186	98.99
AX-158521390	1B	557128571	557128473	98.99
AX-94682892	1B	557715311	557715381	perfect match
BS00096719_51	1B	557715550	557715650	perfect match
AX-86179651	1B	557715753	557715655	98.99
GENE-0120_397	1B	557718544	557718448	97.938
AX-94788458	1B	557737896	557737826	perfect match
RAC875_c95548_156	1B	557738236	557738336	perfect match
AX-158570193	1B	557744821	557744723	98.99
AX-110580885	1B	557856754	557856656	98.99
IACX9308	1B	557882001	557882132	perfect match
wsnp_Ex_c1440_2764867	1B	557882215	557882015	perfect match
AX-158521399	1B	557883117	557883215	98.99
AX-94891105	1B	557884152	557884082	perfect match
AX-158521045	1B	558563204	558563106	98.99
AX-94414376	1B	559478558	559478488	perfect match
Kukri_rep_c111991_498	1B	559718772	559718672	perfect match
Excalibur_c8188_693	1B	559719791	559719691	perfect match
AX-86179442	1B	559841348	559841250	98.99
AX-94533970	1B	559841422	559841492	perfect match
wsnp_Ex_c21559_30710510	1B	559852266	559852466	perfect match
AX-89339073	1B	560253708	560253610	98.99
wsnp_BM140362B_Ta_1_1	1B	560329625	560329723	97.98
AX-95010111	1B	560516966	560517036	perfect match
BS00067769_51	1B	560831561	560831661	perfect match
AX-158606688	1B	561122132	561122230	98.99
AX-158606713	1B	561214067	561214165	98.99
wsnp_Ex_rep_c101231_86636951	1B	561983680	561983880	perfect match
AX-94908088	1B	561988211	561988141	perfect match
AX-109449323	1B	562313405	562313307	98.99
wsnp_Ex_c58292_59652859	1B	562326085	562326285	perfect match
IACX4461	1B	562326245	562326126	98.333
BobWhite_rep_c57575_65	1B	562327686	562327586	perfect match
BS00082521_51	1B	562451526	562451426	perfect match
BS00021975_51	1B	562451584	562451484	perfect match
BS00081396_51	1B	562629969	562629869	perfect match
AX-94861289	1B	562631917	562631847	perfect match
BS00107749_51	1B	562635853	562635953	perfect match
AX-158544869	1B	563684794	563684696	98.99
Ku_c18920_414	1B	564093651	564093551	perfect match
AX-111567165	1B	564146030	564146128	98.99
AX-94412852	1B	564155408	564155506	98.99
CAP8_c818_370	1B	564629571	564629671	perfect match
AX-110606361	1B	565586158	565586060	98.99
AX-95152246	1B	566246912	566246982	perfect match
AX-158521030	1B	566688901	566688803	98.99
AX-94922385	1B	566689512	566689442	perfect match
Tdurum_contig48523_1605	1B	567160919	567161019	98.02
BS00082071_51	1B	567162609	567162709	perfect match
Tdurum_contig48523_1838	1B	567172484	567172584	perfect match
GENE-0315_356	1B	568203366	568203278	97.753
RAC875_c24895_311	1B	568204370	568204270	98.02
AX-158531959	1B	568390598	568390696	98.99
IACX9183	1B	568401219	568401088	perfect match
AX-158521426	1B	568901215	568901117	98.99
wsnp_Ex_c39616_46871127	1B	569054440	569054241	99.005
AX-158570533	1B	569130126	569130224	98.99
Kukri_c25138_1155	1B	569136126	569136026	perfect match
AX-158570494	1B	569176945	569176847	98.99
BS00021710_51	1B	569563512	569563412	perfect match
AX-94488007	1B	569563730	569563660	perfect match
wsnp_Ex_c22439_31632880	1B	569697341	569697141	98.515
AX-108776134	1B	569698051	569698149	98.99
Excalibur_c60931_1260	1B	569699907	569700007	perfect match
AX-158570460	1B	569737198	569737296	98.99
AX-158521360	1B	569961439	569961341	98.99
BS00063092_51	1B	569971252	569971152	perfect match
BS00076405_51	1B	570199655	570199755	perfect match
AX-109339712	1B	570209465	570209367	98.99
Ku_c106533_550	1B	570336109	570336009	perfect match
JD_c107_683	1B	570336820	570336720	98.02
AX-158540245	1B	570337500	570337402	98.99
Tdurum_contig8158_269	1B	570928998	570929098	perfect match
IACX11374	1B	570929072	570928941	perfect match
RAC875_c55891_659	1B	571665125	571665225	perfect match
Excalibur_c14911_976	1B	572441665	572441765	perfect match
Tdurum_contig42852_667	1B	572444600	572444500	perfect match
AX-158556811	1B	572516939	572517037	98.99
AX-158521402	1B	572522355	572522257	98.99
AX-158606852	1B	572708988	572708890	98.99
AX-110404071	1B	573187183	573187281	98.99
Kukri_c7770_176	1B	573404150	573404250	98.02
Tdurum_contig47550_699	1B	573404250	573404150	perfect match
BobWhite_c11044_322	1B	573487409	573487509	perfect match
Tdurum_contig604_356	1B	573562249	573562349	perfect match
AX-158531918	1B	573565433	573565335	98.99
Kukri_c15391_468	1B	573630979	573631079	perfect match
RFL_Contig4235_707	1B	573633434	573633334	perfect match
Tdurum_contig30517_578	1B	573638024	573637924	perfect match
Tdurum_contig30517_310	1B	573638292	573638192	perfect match
Tdurum_contig30517_174	1B	573638428	573638328	perfect match
AX-111098613	1B	573647212	573647114	98.99
AX-158544881	1B	573647283	573647185	98.99
AX-89615400	1B	573822226	573822324	98.99
AX-158531919	1B	573954200	573954298	98.99
Kukri_rep_c103359_233	1B	575349917	575350016	98
wsnp_Ex_c13109_20725640	1B	575352430	575352630	perfect match
wsnp_Ex_c23235_32471767	1B	575395734	575395534	perfect match
wsnp_Ex_c23230_32466568	1B	575795292	575795137	99.359
wsnp_CAP11_c287_244799	1B	576849262	576849461	98.507
AX-111521718	1B	576851708	576851610	98.99
wsnp_Ex_rep_c107911_91350930	1B	577099375	577099575	99.005
AX-158544943	1B	577304863	577304961	98.99
BS00031596_51	1B	577305759	577305859	perfect match
Excalibur_c45119_251	1B	577306708	577306608	perfect match
AX-158521345	1B	577381810	577381908	98.99
wsnp_Ex_c15611_23929128	1B	577659736	577659536	perfect match
wsnp_Ex_c5101_9053178	1B	577660255	577660055	perfect match
wsnp_Ex_c5101_9052671	1B	577660761	577660562	99.005
Kukri_c9133_2211	1B	577661430	577661530	perfect match
AX-158570493	1B	577979423	577979521	98.99
Ex_c11930_509	1B	577994216	577994116	perfect match
TGWA25K-TG0177	1B	578011263	578011361	98.99
AX-158532055	1B	578023380	578023478	98.99
Ku_c956_1797	1B	578256679	578256779	98.02
AX-111061689	1B	578518051	578517953	98.99
wsnp_Ex_c7585_12957020	1B	579109805	579109605	perfect match
AX-108815870	1B	579337722	579337820	98.99
wsnp_Ku_c17017_26019611	1B	579344323	579344523	perfect match
Excalibur_c51898_470	1B	579486280	579486181	98.02
AX-109392359	1B	580370237	580370335	98.99
Tdurum_contig13117_1316	1B	580374757	580374657	perfect match
AX-108878743	1B	580671692	580671790	98.99
AX-110042022	1B	581074625	581074527	98.99
AX-94526208	1B	581082727	581082657	perfect match
AX-158545048	1B	582727770	582727868	98.99
Kukri_c25961_108	1B	582868441	582868541	perfect match
Kukri_c25961_166	1B	582868499	582868599	perfect match
AX-86164688	1B	583028920	583028822	98.99
AX-95254907	1B	583222406	583222476	perfect match
AX-89482339	1B	583684950	583684852	98.99
AX-94492031	1B	584212281	584212181	perfect match
BS00055866_51	1B	584220490	584220390	perfect match
AX-110974122	1B	584642027	584642125	98.99
AX-158545090	1B	586819515	586819417	98.99
AX-158544792	1B	587184260	587184162	98.99
BS00067627_51	1B	587584622	587584522	perfect match
Kukri_c8143_355	1B	588248425	588248525	perfect match
Kukri_c9752_793	1B	588252140	588252240	perfect match
Tdurum_contig69792_167	1B	588252240	588252140	perfect match
Jagger_c7242_85	1B	588458056	588457956	perfect match
wsnp_Ex_c28733_37836638	1B	588736652	588736852	perfect match
Excalibur_c27915_560	1B	588741149	588741049	perfect match
AX-158540093	1B	589134974	589134876	98.99
Kukri_c20486_255	1B	589754046	589754146	perfect match
AX-109909017	1B	589944699	589944601	98.99
AX-158544978	1B	589970917	589971015	98.99
BS00022551_51	1B	590479876	590479976	perfect match
AX-110483510	1B	590718694	590718792	98.99
AX-158570298	1B	591165324	591165226	98.99
Ku_c1932_1583	1B	591183315	591183415	98.02
AX-111496365	1B	592331187	592331285	98.99
AX-94449276	1B	592689830	592689760	perfect match
AX-95257656	1B	593559397	593559327	perfect match
AX-111596716	1B	594023406	594023308	98.99
BS00069125_51	1B	595394753	595394853	perfect match
BS00066855_51	1B	595397130	595397230	perfect match
BS00004328_51	1B	595414051	595414151	98.02
RAC875_c62171_386	1B	595537751	595537651	98.02
wsnp_Ex_c32284_40970312	1B	595538224	595538024	99.005
AX-158540092	1B	595543062	595542964	98.99
Excalibur_c14859_394	1B	595748769	595748869	perfect match
AX-89575570	1B	595782635	595782537	98.99
AX-158570526	1B	596032838	596032936	98.99
Kukri_c42202_271	1B	596049412	596049510	98.99
wsnp_Ex_c1412_2711077	1B	596051307	596051507	perfect match
BobWhite_c17644_456	1B	596052079	596051979	98.02
BS00023148_51	1B	596054916	596054818	98.99
BS00073257_51	1B	596468039	596468139	perfect match
AX-158606902	1B	596492005	596491907	98.99
BobWhite_c39656_106	1B	596898547	596898447	perfect match
BS00040743_51	1B	596955653	596955753	perfect match
BS00010436_51	1B	598073115	598073015	perfect match
BS00042244_51	1B	598196299	598196399	perfect match
Ku_c9909_1766	1B	599132203	599132103	perfect match
AX-89738324	1B	599270593	599270691	98.99
AX-158570544	1B	601725041	601725139	98.99
wsnp_BG606986B_Ta_2_1	1B	602252568	602252688	perfect match
AX-110058495	1B	602549891	602549989	98.99
AX-158532056	1B	604608982	604609080	98.99
AX-158556804	1B	605842015	605842113	98.99
BS00069341_51	1B	606016613	606016714	98.039
RAC875_c39401_502	1B	606470927	606471027	perfect match
BS00023071_51	1B	606471462	606471562	perfect match
AX-158556799	1B	607384671	607384573	98.99
BS00064162_51	1B	608131117	608131017	perfect match
AX-158556824	1B	608249153	608249055	98.99
AX-158556825	1B	608739789	608739691	98.99
AX-158560786	1B	609572917	609572819	98.99
AX-109859763	1B	610372999	610372901	98.99
Excalibur_rep_c107047_605	1B	610457591	610457691	perfect match
Excalibur_rep_c107047_742	1B	610457728	610457828	perfect match
Tdurum_contig96049_200	1B	610906666	610906566	perfect match
IACX886	1B	611702606	611702486	98.347
AX-111688791	1B	612631372	612631274	98.99
AX-109434490	1B	612720770	612720672	98.99
AX-158531987	1B	613055402	613055304	98.99
AX-158521229	1B	613062579	613062481	98.99
AX-158570225	1B	613071911	613071813	98.99
AX-158570232	1B	615483049	615482951	98.99
BS00085365_51	1B	615657144	615657043	98.039
AX-94631246	1B	615985145	615985075	perfect match
AX-158570234	1B	619584327	619584425	98.99
AX-158570666	1B	620097187	620097285	98.99
AX-158561003	1B	620131981	620131883	98.99
AX-158544988	1B	620326826	620326924	98.99
BS00023941_51	1B	620514796	620514696	perfect match
AX-94503785	1B	620515964	620515894	perfect match
AX-94873552	1B	620516019	620515949	perfect match
AX-94506854	1B	620516417	620516347	perfect match
AX-89719057	1B	621275632	621275534	98.99
AX-89670926	1B	621384273	621384175	98.99
Tdurum_contig10362_555	1B	621422530	621422430	perfect match
Tdurum_contig10362_328	1B	621422757	621422657	perfect match
IACX906	1B	621541474	621541594	98.347
Kukri_c19247_53	1B	621542028	621542128	perfect match
AX-158537661	1B	621543895	621543993	98.99
TA003586-0637	1B	621545042	621545095	perfect match
Kukri_c19247_711	1B	621545135	621545235	perfect match
BobWhite_c48071_144	1B	621545367	621545267	perfect match
Excalibur_c93510_360	1B	621871284	621871184	perfect match
Kukri_c30461_857	1B	621872971	621872871	perfect match
AX-94879161	1B	621875314	621875244	perfect match
BS00022577_51	1B	622205034	622204934	perfect match
GENE-0506_129	1B	622205049	622205149	perfect match
wsnp_BE590634B_Ta_2_1	1B	622205682	622205802	98.347
AX-158570551	1B	623199259	623199357	98.99
Excalibur_c28045_741	1B	626319231	626319131	98.02
wsnp_Ex_c194_381656	1B	626745836	626745636	perfect match
IAAV8459	1B	626746531	626746331	perfect match
BS00022851_51	1B	626747916	626747816	perfect match
BS00095088_51	1B	626747944	626747844	perfect match
Ku_c16636_347	1B	626750147	626750047	perfect match
wsnp_Ex_c18384_27213023	1B	626751583	626751384	98.507
BS00021680_51	1B	626751928	626751828	perfect match
Ku_c79340_308	1B	626754130	626754031	99
Kukri_c14733_486	1B	627760421	627760321	perfect match
AX-158570191	1B	628078276	628078178	98.99
AX-158544944	1B	628684126	628684224	98.99
BS00063928_51	1B	628687725	628687825	perfect match
BS00022530_51	1B	629358017	629357917	perfect match
AX-110441489	1B	629507595	629507693	98.99
IACX1240	1B	629510435	629510327	perfect match
wsnp_BE494527B_Ta_2_1	1B	629510501	629510381	perfect match
AX-95172164	1B	630723511	630723441	perfect match
RFL_Contig5937_1677	1B	630765283	630765383	perfect match
RAC875_c47427_75	1B	630766026	630766126	perfect match
BS00083060_51	1B	630766299	630766399	perfect match
BS00110231_51	1B	631022131	631022231	perfect match
Excalibur_c581_1220	1B	631535368	631535468	perfect match
AX-158520938	1B	632597868	632597770	98.99
AX-158520943	1B	632633016	632632918	98.99
Tdurum_contig47253_1624	1B	632633447	632633547	perfect match
AX-158540183	1B	633128688	633128786	98.99
Tdurum_contig41945_748	1B	633129623	633129523	perfect match
Tdurum_contig67656_387	1B	633144183	633144083	perfect match
BS00074911_51	1B	633284655	633284555	perfect match
AX-158521339	1B	633644636	633644538	98.99
AX-158570258	1B	633751401	633751303	98.99
RAC875_c66649_186	1B	633761238	633761338	perfect match
AX-158521195	1B	633762933	633763031	98.99
AX-158570312	1B	634967663	634967761	98.99
wsnp_Ex_c5296_9365860	1B	634989252	634989052	99.005
Tdurum_contig53772_362	1B	635049218	635049118	98.02
AX-158606548	1B	635073186	635073284	98.99
Tdurum_contig65853_242	1B	635596143	635596243	perfect match
AX-158521177	1B	635682773	635682871	98.99
AX-158570025	1B	635683565	635683663	98.99
AX-158521173	1B	635698821	635698919	98.99
AX-158531962	1B	635699120	635699218	98.99
AX-94871042	1B	635890039	635890109	perfect match
Tdurum_contig57927_171	1B	636234637	636234737	perfect match
BS00022411_51	1B	636235047	636235147	perfect match
BS00072791_51	1B	636339387	636339287	perfect match
AX-158521377	1B	636557154	636557252	98.99
AX-158521172	1B	636558702	636558800	98.99
AX-158521378	1B	636559002	636559100	98.99
BS00022249_51	1B	636561546	636561646	perfect match
AX-158521170	1B	636951873	636951971	98.99
AX-109859227	1B	637008669	637008571	98.99
BS00096498_51	1B	637010265	637010165	perfect match
AX-94553813	1B	637633435	637633505	perfect match
IACX4411	1B	637893267	637893148	98.333
AX-94897804	1B	638124944	638124874	perfect match
AX-158532050	1B	638775887	638775789	98.99
Ra_c17685_927	1B	638777105	638777205	perfect match
tplb0043k02_463	1B	638891376	638891276	perfect match
BobWhite_c13124_430	1B	639058498	639058597	98
BS00067525_51	1B	639067004	639066904	perfect match
AX-89441009	1B	639067991	639067893	98.99
AX-158560781	1B	639081026	639080928	98.99
AX-94719582	1B	639473460	639473390	perfect match
RAC875_c839_352	1B	639473984	639473884	98.02
BS00065257_51	1B	640054761	640054861	perfect match
AX-94462630	1B	640388718	640388648	perfect match
AX-111075425	1B	640547732	640547634	98.99
RAC875_c46093_492	1B	640578656	640578756	perfect match
AX-158532049	1B	641380063	641379965	98.99
Kukri_c63336_621	1B	641399212	641399112	perfect match
AX-95259256	1B	642224217	642224287	perfect match
AX-94773580	1B	642226277	642226347	perfect match
AX-158606849	1B	643144244	643144186	perfect match
Kukri_c18109_331	1B	643477904	643478004	perfect match
Kukri_c18109_649	1B	643478795	643478895	perfect match
AX-109311435	1B	643957818	643957916	98.99
BS00022176_51	1B	643970102	643970202	perfect match
BS00039135_51	1B	643985337	643985237	perfect match
AX-111478328	1B	644032980	644032882	98.99
Tdurum_contig777_260	1B	644580848	644580748	perfect match
AX-158545079	1B	644777949	644777851	98.99
AX-89709129	1B	644852198	644852100	98.99
BS00084216_51	1B	645055271	645055171	98.02
Excalibur_c10111_127	1B	645055369	645055269	perfect match
AX-158540213	1B	645243054	645242956	98.99
AX-158532066	1B	645243191	645243093	98.99
BS00094237_51	1B	645243357	645243457	perfect match
BS00089790_51	1B	646329255	646329355	perfect match
Excalibur_c11980_619	1B	647956951	647956851	perfect match
BobWhite_c2027_84	1B	647957110	647957012	97.03
Kukri_c39223_871	1B	647957548	647957448	perfect match
Kukri_c39223_831	1B	647957588	647957488	perfect match
Tdurum_contig93532_89	1B	647960634	647960734	perfect match
BS00069044_51	1B	648013492	648013392	perfect match
AX-95144598	1B	648041119	648041049	perfect match
GENE-0371_208	1B	648249266	648249366	98.02
Tdurum_contig42491_750	1B	648249598	648249698	perfect match
JD_c954_2440	1B	648250369	648250469	perfect match
AX-94880896	1B	648265244	648265174	perfect match
AX-158595653	1B	648928650	648928748	98.99
Excalibur_c63885_115	1B	649030501	649030601	perfect match
AX-158569736	1B	650032816	650032914	98.99
RAC875_c818_1185	1B	650073749	650073849	perfect match
IAAV7428	1B	650074455	650074655	perfect match
Ex_c25733_348	1B	650165855	650165955	98.02
AX-158544973	1B	650479572	650479670	98.99
BS00084895_51	1B	650481330	650481230	perfect match
Tdurum_contig50988_500	1B	652861279	652861179	perfect match
AX-109479115	1B	652892208	652892110	98.99
Excalibur_c8585_701	1B	652921420	652921520	perfect match
BobWhite_c23617_167	1B	652921479	652921379	perfect match
Tdurum_contig11216_942	1B	652922035	652922135	perfect match
Jagger_c3757_131	1B	652922074	652921974	perfect match
BS00099794_51	1B	653056662	653056761	99
RFL_Contig1823_1044	1B	653056741	653056841	perfect match
AX-108766320	1B	653430782	653430880	98.99
wsnp_CAP11_c1902_1022408	1B	653520721	653520921	perfect match
Kukri_c57725_146	1B	653521140	653521040	perfect match
BS00070285_51	1B	653525232	653525330	98.99
BS00002484_51	1B	653525593	653525493	perfect match
BS00043666_51	1B	655781450	655781550	perfect match
AX-158606699	1B	658826036	658826134	98.99
BS00077498_51	1B	658852556	658852456	perfect match
BS00022678_51	1B	658854557	658854657	perfect match
Excalibur_c49496_705	1B	659785705	659785605	perfect match
BS00068077_51	1B	659800213	659800313	perfect match
BS00035267_51	1B	659906966	659907066	perfect match
IACX2984	1B	660514586	660514705	perfect match
AX-158606326	1B	660590884	660590982	98.99
AX-158540235	1B	661201203	661201105	98.99
AX-158540195	1B	661213058	661212960	98.99
Tdurum_contig8840_575	1B	661350159	661350059	perfect match
AX-94900228	1B	661350186	661350116	perfect match
AX-158561006	1B	661561874	661561972	98.99
BS00061472_51	1B	661562377	661562477	perfect match
BS00028476_51	1B	662124761	662124661	perfect match
BS00064052_51	1B	662563497	662563597	perfect match
AX-158556878	1B	662775089	662775187	98.99
BS00023173_51	1B	663090652	663090552	perfect match
AX-109326596	1B	663091033	663091131	98.99
AX-109510374	1B	663106610	663106708	98.99
BS00045568_51	1B	663107333	663107233	98.02
AX-158521393	1B	663539854	663539756	98.99
AX-158532072	1B	663980225	663980323	98.99
AX-158521397	1B	664058751	664058653	98.99
AX-94524314	1B	664152543	664152613	perfect match
AX-95660051	1B	664475667	664475765	98.99
BS00075129_51	1B	665778774	665778874	perfect match
RAC875_rep_c111494_195	1B	665826020	665826120	perfect match
AX-95629691	1B	665826823	665826725	98.99
Kukri_c36758_140	1B	666006576	666006476	perfect match
AX-94620918	1B	666008154	666008084	perfect match
BS00071893_51	1B	666048284	666048184	perfect match
AX-109511115	1B	666273458	666273360	98.99
AX-158570498	1B	666656735	666656833	98.99
Tdurum_contig68980_448	1B	668438677	668438777	98.02
AX-158537634	1B	668511039	668510941	98.99
AX-94780679	1B	668525725	668525655	perfect match
BS00032040_51	1B	668949065	668949165	perfect match
wsnp_Ex_c4774_8519623	1B	669136731	669136531	perfect match
GENE-0063_68	1B	670019010	670019108	perfect match
Tdurum_contig57153_1356	1B	670020524	670020624	perfect match
CAP12_c1085_283	1B	670576015	670575915	perfect match
Tdurum_contig10475_87	1B	670576228	670576128	perfect match
AX-110280893	1B	670613672	670613574	98.99
AX-94417303	1B	670708934	670709004	perfect match
AX-158570571	1B	670708944	670709042	98.99
AX-94489390	1B	670708959	670709029	perfect match
AX-158570261	1B	671096193	671096286	perfect match
AX-158545108	1B	671217882	671217784	98.99
BS00078413_51	1B	671266481	671266581	perfect match
BS00078414_51	1B	671266497	671266597	perfect match
RFL_Contig5022_2001	1B	671593867	671593967	perfect match
AX-94475367	1B	672149260	672149190	perfect match
Tdurum_contig18557_228	1B	672840917	672841017	perfect match
AX-158544997	1B	672853505	672853407	98.99
IACX2234	1B	672857537	672857656	perfect match
Tdurum_contig55429_147	1B	672857647	672857547	98.02
Tdurum_contig55429_116	1B	672857678	672857578	98.02
wsnp_CAP12_c1337_682282	1B	673327059	673326859	99.005
Kukri_c18230_1633	1B	673341749	673341649	perfect match
AX-89617532	1B	673355486	673355584	98.99
AX-158544856	1B	673356133	673356231	98.99
AX-158595695	1B	673906197	673906295	98.99
Excalibur_c88292_81	1B	674389771	674389671	98.02
AX-158570197	1B	675418057	675418155	98.99
RAC875_c55934_165	1B	675432700	675432800	perfect match
AX-158560947	1B	675522327	675522425	98.99
AX-95076278	1B	675814338	675814268	perfect match
Tdurum_contig61914_169	1B	676300548	676300448	perfect match
AX-94664720	1B	676636626	676636696	perfect match
Ex_c4436_1947	1B	676703507	676703607	perfect match
AX-108797365	1B	676705589	676705687	98.99
AX-94855067	1B	676710688	676710618	perfect match
AX-158540222	1B	676720484	676720582	98.99
BS00037246_51	1B	676779399	676779499	perfect match
CAP7_rep_c6352_375	1B	677487732	677487632	perfect match
AX-94527502	1B	678992841	678992911	perfect match
AX-158521252	1B	679340433	679340335	98.99
AX-94522424	1B	679342284	679342354	perfect match
AX-158540096	1B	679753993	679754091	98.99
Tdurum_contig94450_255	1B	679754847	679754947	perfect match
Tdurum_contig93330_263	1B	681736855	681736955	98.02
Kukri_c1259_864	1B	681737056	681736956	98.02
Tdurum_contig93330_656	1B	681737350	681737450	perfect match
AX-158561054	1B	682159039	682158941	98.99
AX-158540231	1B	682194140	682194238	98.99
AX-94956073	1B	682196218	682196288	perfect match
AX-94514569	1B	682300748	682300818	perfect match
BS00084990_51	1B	682300851	682300951	perfect match
Tdurum_contig62905_165	1B	682339495	682339595	perfect match
AX-108750850	1B	682411703	682411801	98.99
Tdurum_contig84791_198	1B	682555676	682555776	perfect match
AX-158532078	1B	682632196	682632098	98.99
AX-158521157	1B	682927186	682927284	98.99
wsnp_CAP11_c2596_1325540	1B	683049068	683049267	99.005
AX-158521153	1B	683180295	683180393	98.99
AX-94993375	1B	683181627	683181697	perfect match
BobWhite_c14422_282	1B	683206767	683206667	perfect match
Tdurum_contig42558_134	1B	683207619	683207519	perfect match
RAC875_c4036_1020	1B	683213417	683213317	perfect match
Kukri_c875_126	1B	683215232	683215132	98.02
AX-95110051	1B	683352455	683352385	perfect match
AX-94856891	1B	683352763	683352693	perfect match
BS00107837_51	1B	683365848	683365948	perfect match
AX-111479319	1B	683920085	683919987	98.99
AX-109338549	1B	684103338	684103436	98.99
AX-111027687	1B	684111863	684111961	98.99
RAC875_c24317_1351	1B	684619470	684619370	perfect match
BS00066305_51	1B	684739497	684739397	perfect match
Excalibur_c13076_384	1B	684807652	684807752	perfect match
BobWhite_c34125_183	1B	684808187	684808087	perfect match
AX-158521190	1B	685307599	685307501	98.99
AX-89357416	1B	685343268	685343170	98.99
AX-158521187	1B	685343410	685343312	98.99
BS00063302_51	1B	685344322	685344422	perfect match
AX-95105440	1B	685620730	685620800	perfect match
BS00093275_51	1B	685783458	685783358	perfect match
AX-94437898	1B	685784554	685784454	perfect match
AX-94758722	1B	687028902	687028832	perfect match
tplb0049h18_1121	1B	687035475	687035375	perfect match
AX-158521247	1B	687035744	687035646	98.99
AX-95202607	1B	687572302	687572372	perfect match
AX-158545078	1B	687597560	687597462	98.99
AX-158521163	1B	687786181	687786083	98.99
Excalibur_c35289_64	1B	688183300	688183200	98.02
AX-158531993	1B	688454052	688454150	98.99
Excalibur_c39284_1132	1B	688632392	688632492	perfect match
Tdurum_contig13879_352	1B	689078712	689078812	perfect match
AX-108897421	1B	689897006	689896908	98.99
wsnp_Ex_c649_1279852	1B	690326556	690326356	perfect match
AX-110530170	1B	690689920	690690018	98.99
Tdurum_contig10099_538	1B	690706333	690706433	perfect match
RAC875_rep_c71408_412	1B	690707208	690707308	perfect match
BS00010807_51	1B	690710845	690710945	perfect match
Excalibur_c55186_351	1B	690711212	690711112	perfect match
AX-94674125	1B	692633641	692633711	perfect match
Tdurum_contig49509_606	1B	694518487	694518587	perfect match
AX-95199802	1B	694807503	694807573	perfect match
Tdurum_contig1631_240	1B	696719751	696719851	98.02
wsnp_Ex_c750_1474351	1B	696723090	696723290	99.005
AX-94768169	1B	696951538	696951608	perfect match
wsnp_BE446672B_Ta_2_1	1B	697669202	697669082	perfect match
Tdurum_contig9144_222	1B	697670372	697670272	perfect match
Tdurum_contig92835_177	1B	697670939	697671039	perfect match
BS00027006_51	1B	697671055	697670955	perfect match
RAC875_c9601_1680	1B	697747791	697747891	perfect match
wsnp_Ex_c17990_26770800	1B	697747835	697748035	perfect match
AX-94817190	1B	697749515	697749585	perfect match
Excalibur_c25640_110	1B	697752405	697752305	perfect match
wsnp_RFL_Contig2550_2175772	1B	698174822	698174722	perfect match
BS00104270_51	1B	698175326	698175226	perfect match
BobWhite_c38981_117	1B	698181950	698182050	perfect match
RAC875_c6537_584	1B	698225414	698225514	perfect match
wsnp_Ex_c1597_3045682	1B	698226043	698225843	perfect match
AX-94446430	1B	698323787	698323717	perfect match
AX-110448375	1D	36695	36597	98.99
AX-158537831	1D	57020	57118	98.99
IAAV1917	1D	64955	65074	98.333
RAC875_c20883_693	1D	65536	65436	perfect match
Kukri_c26168_713	1D	66138	66238	perfect match
D_GDS7LZN02IXNP1_255	1D	100830	101078	99.2
RAC875_c10925_1887	1D	177349	177249	perfect match
AX-94519856	1D	671212	671282	perfect match
Excalibur_c12254_2003	1D	2654649	2654749	perfect match
RFL_Contig3481_1669	1D	2684879	2684979	perfect match
AX-94607341	1D	2721029	2720929	perfect match
wsnp_Ex_c278_538285	1D	2851006	2850806	perfect match
RAC875_c2070_566	1D	2851569	2851469	perfect match
wsnp_Ex_c41048_47969948	1D	3051756	3051956	perfect match
CAP12_c8501_370	1D	3051782	3051682	perfect match
CAP12_c3074_192	1D	3156890	3156990	perfect match
Kukri_c37738_417	1D	3183262	3183362	perfect match
AX-94968521	1D	3183588	3183518	perfect match
AX-94518190	1D	4164616	4164686	perfect match
BS00021723_51	1D	4174145	4174245	perfect match
AX-94772107	1D	4176189	4176259	perfect match
BS00096470_51	1D	5801188	5801288	perfect match
AX-94633096	1D	7639397	7639467	perfect match
AX-95215584	1D	7639413	7639483	perfect match
AX-94716901	1D	7775630	7775560	perfect match
Excalibur_c9676_163	1D	7933978	7934078	perfect match
AX-95153847	1D	8288492	8288592	perfect match
wsnp_Ex_c1969_3705930	1D	8293916	8293716	perfect match
BobWhite_rep_c49356_237	1D	8296695	8296795	98.02
RFL_Contig4140_1135	1D	8366878	8366778	perfect match
wsnp_BE637971D_Ta_2_3	1D	8367585	8367465	perfect match
BobWhite_c1715_887	1D	8594218	8594118	98.02
wsnp_Ex_c1358_2600929	1D	9016388	9016588	perfect match
Tdurum_contig46413_680	1D	9016939	9017039	98.02
AX-94466102	1D	9016964	9016894	perfect match
wsnp_Ex_c1358_2602235	1D	9017694	9017894	perfect match
Kukri_c837_436	1D	9021046	9020946	perfect match
wsnp_Ra_c2633_5017265	1D	9021198	9021398	99.005
BS00076278_51	1D	9022734	9022634	perfect match
Excalibur_c8052_201	1D	9033903	9034003	perfect match
Excalibur_c8052_1867	1D	9036570	9036670	perfect match
D_GB5Y7FA01BMOJY_241	1D	9131190	9130941	perfect match
AX-158557197	1D	9661140	9661238	98.99
Kukri_c8211_159	1D	10274281	10274181	perfect match
Ku_c13622_482	1D	10591198	10591298	perfect match
BS00069300_51	1D	10704462	10704562	perfect match
RAC875_c16352_594	1D	10790822	10790922	perfect match
BobWhite_c33756_74	1D	10791780	10791680	perfect match
AX-158557211	1D	10835674	10835576	98.99
[truncated: 12,683 more rows]

## Sheet: ST7B
Supplementary Table S7B: Molecular marker distribution (14,640 SNPs) in the A, B, D, and whole genomes
Chr./Genome	No. of SNP	Chr. length (Mb)a	Marker density (Mb/SNP)b	Real chr. length (Mb)c
1A	867	596.886	0.68845	608.6
2A	856	787.438	0.919905	800.9
3A	829	752.256	0.907426	766.7
4A	528	751.366	1.42304	766.8
5A	1072	710.839	0.663096	725.2
6A	771	622.357	0.807207	633
7A	1071	743.933	0.694615	756.9
1B	1082	697.134	0.644301	712.2
2B	1081	811	0.750231	826.3
3B	1127	851.798	0.75581	866.1
4B	534	672.527	1.25941	685
5B	1158	714.7	0.617185	726.7
6B	888	730.8	0.822973	743.4
7B	820	763.6	0.93122	776.4
1D	409	498.258	1.21823	506.9
2D	419	566.3	1.35155	667.5
3D	212	618.835	2.91903	629.9
4D	97	512.85	5.28712	527
5D	275	566.1	2.05855	579.5
6D	272	493.8	1.81544	503.6
7D	272	642.468	2.36201	653.6
A	5994	4965.1	0.828345	---
B	6690	5241.6	0.783498	---
D	1956	3898.6	1.99315	---
Chr.: chromosome
No. : number
a calculated as the difference between the position of the last and first marker
b calculated on chr. length*
c the estimated length of chromosome (IWGSC, 2018)
