# Supplementary material for: Ancient diversity of Triticum aestivum subspecies as source of novel loci for bread wheat improvement
Source: Front Plant Sci. 2025 Apr 9;16:1536991. doi: 10.3389/fpls.2025.1536991 (PMC12014548; doi:10.3389/fpls.2025.1536991)
Supplement: Supplementary file 13 [file Table9.xlsx]

## Sheet: ST9
Supplementary Table S9: HC genes located in the MTA regions associated to multiple traits (peak marker position ± LD for specific for each chromosome) and the relative functional annotation base on IWGSC RefSeq v2.1
Peak marker (Chromosome: position in bp)	LD in the Chromosome (bp)	Traits	High Confidence Genes 2.1	Position (Bbp)	IWGSC_refseqv2.1_functional_annotation
JD_c954_2440 (1B: 648 250 369)	150000	FLW, FLA	TraesCS1B03G1120600	648 204 029..648 205 031	InterPro,"","IPR021983","PRP8 domain IV core"
			TraesCS1B03G1120700	648 245 559..648 252 925
			TraesCS1B03G1120800	648 264 894..648 267 929	Pfam,"","PF00829","Ribosomal prokaryotic L21 protein"
AX-94541185 (2A: 452 564 062)	150000	SS, SL, SD, SD^, GC	TraesCS2A03G0678400	452 485 784..452 487 364	Gene Ontology,"CC","GO:0005840","ribosome"
			TraesCS2A03G0678600	452 488 142..452 497 186	Gene Ontology,"BP","GO:0006508","proteolysis"
			TraesCS2A03G0679100	452 555 403..452 564 194	Pfam,"","PF00481","Protein phosphatase 2C"
AX-158562171 (2D: 187 629 499)	850000	SS, SL	---	---
AX-89640158 (2D: 342 959 863)	850000	SL, SD^, SD	TraesCS2D03G0632800	342 704 039..342 718 556	InterPro,"","IPR011989","Armadillo-like helical"
			TraesCS2D03G0632900	342 721 085..342 727 242
			TraesCS2D03G0633300	342 958 517..342 961 247
			TraesCS2D03G0633700	343 038 349..343 045 614	InterPro,"","IPR006620","Prolyl 4-hydroxylase, alpha subunit"
			TraesCS2D03G0634100	343 139 237..343 141 052
AX-158522249 (2D: 360 172 914)	850000	SS, SL, SD, SD^	TraesCS2D03G0657000	360 166 811..360 171 423	Blast-Hit-Accession,"","tr|A0A0K9NNE9|A0A0K9NNE9_ZOSMR",""
			TraesCS2D03G0657100	360 171 023..360 171 214
			TraesCS2D03G0657200	360 172 116..360 176 618	InterPro,"","IPR004813","Oligopeptide transporter, OPT superfamily"
			TraesCS2D03G0657300	360 330 843..360 331 190
	850000		TraesCS2D03G0657600	360 437 718..360 454 678	Pfam,"","PF16099","Recq-mediated genome instability protein 1, C-terminal OB-fold"
			TraesCS2D03G0657700	360 442 943..360 444 851	InterPro,"","IPR020904","Short-chain dehydrogenase/reductase, conserved site"
			TraesCS2D03G0657800	360 445 245..360 447 210	InterPro,"","IPR002347","Short-chain dehydrogenase/reductase SDR"
			TraesCS2D03G0658600	360 599 466..360 601 809	Gene Ontology,"BP","GO:0008152","metabolic process"
			TraesCS2D03G0658800	360 920 007..360 924 809	InterPro,"","IPR011009","Protein kinase-like domain"
AX-108781921 (2D: 371 893 971)	850000	SL, SD^, SD	TraesCS2D03G0668200	371 351 778..371 353 445	Blast-Hit-Accession,"","AT3G12920.1",""
			TraesCS2D03G0668600	371 787 994..371 793 705
AX-108781921 (2D: 371 893 971)	AX-108781921 (2D: 371 893 971)		TraesCS2D03G0668700	371 878 086..371 891 500
			TraesCS2D03G0668800	371 891 549..371 891 833
			TraesCS2D03G0668900	371 892 355..371 896 606	Pfam,"","PF00481","Protein phosphatase 2C"
			TraesCS2D03G0669000	372 132 249..372 132 554
			TraesCS2D03G0669200	372 172 287..372 173 396
			TraesCS2D03G0670400	372 583 756..372 585 243
			TraesCS2D03G0670500	372 645 126..372 650 983	Pfam,"","PF13193","AMP-binding enzyme C-terminal domain"
Kukri_c3168_521 (3B: 159 428 491)	250000	SNS, FSNS	TraesCS3B03G0370000	159 287 405..159 288 719	Blast-Hit-Accession,"","tr|A0A061DNP1|A0A061DNP1_THECC",""
			TraesCS3B03G0370300	159 292 646..159 296 747	InterPro,"","IPR019775","WD40 repeat, conserved site"
	250000		TraesCS3B03G0370600	159 352 672..159 354 136
			TraesCS3B03G0371200	159 617 346..159 617 933	Pfam,"","PF00319","SRF-type transcription factor (DNA-binding and dimerisation domain)"
			TraesCS3B03G0371300	159 618 029..159 621 517	Gene Ontology,"MF","GO:0005524","ATP binding"
			TraesCS3B03G0371500	159 678 242..159 679 641	InterPro,"","IPR001077","O-methyltransferase, family 2"
			TraesCS3B03G0372300	160 035 182..160 044 973
AX-158583339 (4B: 15 020 330)	350000	PH, FLVi, NBIi	TraesCS4B03G0036600	14 793 756..14 795 965	Gene Ontology,"MF","GO:0045735","nutrient reservoir activity"
			TraesCS4B03G0037000	14 819 047..14 821 688	Pfam,"","PF00190","Cupin"
			TraesCS4B03G0037100	14 829 643..14 834 893	Gene Ontology,"CC","GO:0005634","nucleus"
			TraesCS4B03G0037200	14 835 047..14 839 810	Blast-Hit-Accession,"","tr|M7YQ04|M7YQ04_TRIUA",""
			TraesCS4B03G0037300	14 866 669..14 868 524
			TraesCS4B03G0037700	15 018 264..15 019 321
			TraesCS4B03G0037800	15 020 905..15 022 023
			TraesCS4B03G0037900	15 022 046..15 026 127
			TraesCS4B03G0038000	15 038 365..15 039 493	Pfam,"","PF13302","Acetyltransferase (GNAT) domain"
			TraesCS4B03G0038100	15 040 448..15 043 277
			TraesCS4B03G0038200	15 136 397..15 136 759
			TraesCS4B03G0038300	15 149 172..15 152 263
			TraesCS4B03G0038400	15 156 746..15 162 716	Pfam,"","PF12783","Guanine nucleotide exchange factor in Golgi transport N-terminal"
			TraesCS4B03G0038500	15 162 926..15 167 293
AX-94723827 (5A: 678 693 050)	250000	NBIs, NBIi	TraesCS5A03G1202200	678 618 113..678 618 382
			TraesCS5A03G1202300	678 689 606..678 691 003	Gene Ontology,"MF","GO:0003677","DNA binding"
			TraesCS5A03G1202400	678 692 610..678 697 120	Blast-Hit-Accession,"","tr|A0A061FV73|A0A061FV73_THECC",""
			TraesCS5A03G1202700	678 755 866..678 758 610	Pfam,"","PF13768","von Willebrand factor type A domain"
			TraesCS5A03G1202900	678 767 154..678 768 638
			TraesCS5A03G1203000	678 772 270..678 775 478	InterPro,"","IPR001371","Glycoside hydrolase, family 14B, plant"
			TraesCS5A03G1203100	678 935 942..678 937 957	InterPro,"","IPR001147","Ribosomal protein L21e"
			TraesCS5A03G1203200	678 941 500..678 946 425
tplb0056d17_78 (6A: 557 071 115)	150000	CHLs,CHLi	TraesCS6A03G0827200	557 071 082..557 072 731
			TraesCS6A03G0827300	557 072 988..557 080 379	InterPro,"","IPR023631","Amidase signature domain"
			TraesCS6A03G0827400	557 094 918..557 096 350	InterPro,"","IPR009057","Homeobox domain-like"
			TraesCS6A03G0827500	557 165 565..557 167 158	InterPro,"","IPR017930","Myb domain"
			TraesCS6A03G0827600	557 167 634..557 171 269	InterPro,"","IPR001854","Ribosomal protein L29/L36"
			TraesCS6A03G0827700	557 196 566..557 201 624	Blast-Hit-Accession,"","tr|A0A1D6BAP0|A0A1D6BAP0_WHEAT",""
			TraesCS6A03G0827900	557 211 032..557 214 991	Human readable description,"","F-box family protein",""
CAP12_c118_95 (6A: 557 483 060)	150000	CHLs,CHLi, NBIs, NBIi	TraesCS6A03G0828200	557 460 983..557 461 744	Blast-Hit-Accession,"","tr|W9R7J5|W9R7J5_9ROSA",""
			TraesCS6A03G0828700	557 481 033..557 483 176
			TraesCS6A03G0828800	557 483 351..557 486 006
			TraesCS6A03G0829000	557 590 651..557 600 950	Pfam,"","PF03254","Xyloglucan fucosyltransferase"
			TraesCS6A03G0829100	557 601 926..557 619 487	Human readable description,"","RNA polymerase-associated CTR9-like protein",""
AX-89493979 (6B: 479 321 198)	150000	DTH, FLL, FLA, SS	TraesCS6B03G0766700	479 319 600..479 320 930
			TraesCS6B03G0767200	479 332 384..479 333 710
			TraesCS6B03G0767400	479 384 176..479 386 997	Pfam,"","PF00085","Thioredoxin"
	150000		TraesCS6B03G0767600	479 428 685..479 429 053
			TraesCS6B03G0767700	479 457 554..479 464 803	Pfam,"","PF00450","Serine carboxypeptidase"
RAC875_c25839_225 (6D: 313 754 095)	450000	CHLs,CHLi, NBIi	TraesCS6D03G0511800	313 460 876..313 461 280
			TraesCS6D03G0511900	313 461 433..313 463 998	Gene Ontology,"MF","GO:0004672","protein kinase activity"
			TraesCS6D03G0512100	313 471 342..313 475 118	Blast-Hit-Accession,"","tr|B9RVA8|B9RVA8_RICCO",""
			TraesCS6D03G0512200	313 613 925..313 617 794	Blast-Hit-Accession,"","sp|P93194|RPK1_IPONI",""
			TraesCS6D03G0512800	313 647 477..313 649 076
			TraesCS6D03G0513100	313 653 897..313 660 264
			TraesCS6D03G0513200	313 717 511..313 722 817
			TraesCS6D03G0513600	313 748 939..313 772 978	Gene Ontology,"MF","GO:0005515","protein binding"
			TraesCS6D03G0513800	313 975 388..313 984 863	InterPro,"","IPR029058","Alpha/Beta hydrolase fold"
			TraesCS6D03G0514300	314 053 120..314 055 530	InterPro,"","IPR001087","GDSL lipase/esterase"
			TraesCS6D03G0514400	314 057 048..314 066 880	InterPro,"","IPR015847","Exoribonuclease, phosphorolytic domain 2"
			TraesCS6D03G0514500	314 067 285..314 073 098
IACX7421 (7D: 630 908 232)	350000	SNS, FLW	TraesCS7D03G1259600	630 648 029..630 649 048
			TraesCS7D03G1259700	630 659 721..630 660 787
			TraesCS7D03G1259800	630 674 311..630 675 505
			TraesCS7D03G1259900	630 704 133..630 708 889	InterPro,"","IPR003593","AAA+ ATPase domain"
			TraesCS7D03G1260100	630 744 996..630 747 615
			TraesCS7D03G1260300	630 782 100..630 783 183	Gene Ontology,"MF","GO:0004568","chitinase activity"
			TraesCS7D03G1260400	630 805 077..630 806 033	Gene Ontology,"MF","GO:0008061","chitin binding"
			TraesCS7D03G1260500	630 812 894..630 813 859	InterPro,"","IPR001002","Chitin-binding, type 1"
			TraesCS7D03G1260600	630 817 596..630 818 549	Gene Ontology,"BP","GO:0006032","chitin catabolic process"
			TraesCS7D03G1260800	630 883 493..630 884 300	InterPro,"","IPR013087","Zinc finger C2H2-type"
			TraesCS7D03G1260900	630 890 143..630 890 439
			TraesCS7D03G1261100	630 899 205..630 900 101	Gene Ontology,"MF","GO:0003677","DNA binding"
			TraesCS7D03G1261200	630 906 584..630 912 607	Human readable description,"","1,4-alpha-glucan branching enzyme",""
			TraesCS7D03G1261300	630 930 270..630 935 001	Human readable description,"","1,4-alpha-glucan branching enzyme",""
			TraesCS7D03G1261400	630 936 746..630 942 813	InterPro,"","IPR017853","Glycoside hydrolase superfamily"
			TraesCS7D03G1261700	630 990 824..630 995 015
			TraesCS7D03G1262100	631 015 289..631 018 912	InterPro,"","IPR006671","Cyclin, N-terminal"
			TraesCS7D03G1262300	631 033 421..631 034 998
			TraesCS7D03G1262500	631 034 354..631 034 986	Gene Ontology,"BP","GO:0055114","oxidation-reduction process"
